# Supplementary material for: Predictive value of peripheral blood inflammatory biomarkers in immunotherapy for extensive-stage small-cell lung cancer
Source: Research Square preprint supplement (doi:10.21203/rs.3.rs-7744188/v1), 2025-12-16
Supplement: Supplementary file 1 [file f5e0314e802e21947f6eb870.xlsx]

## Sheet: Sheet1
姓名	登记号	性别	年龄	吸烟史	吸烟史(1是，0否)	电话号码	身高	体重	BMI	PS评分 0-2 3-4	免疫治疗线数	有无放疗	确诊日期	开始免疫治疗	PFS时间	PFS	PFS(0未达到 1达到)	OS时间	OS(0未达到 1达到)	治疗方案	肿瘤分期	TNM	治疗前白细胞计数	治疗前中性粒细胞计数	治疗前淋巴细胞计数	NLR	白细胞总数 - 中性粒细胞计数)	LIPI	LIPI	NLR	治疗前单核细胞计数	MLR	MLR	治疗前血小板计数		PLR	治疗前平均血小板体积	1	治疗前C反应蛋白	治疗前乳酸脱氢酶	1	治疗前血清白蛋白	mGPS	白细胞	治疗后4个周期后中性粒细胞计数	WBC-N	dNLR	LIPI	治疗后4个周期后淋巴细胞计数
胡志军	1257053	女	76	无	0	13507377168	1.61	63	24.3046	1	1	有	2020/03/13	2020.3.19	2021.4.17	13.3	1	21.4	1	依托泊苷 0.16g d1-3， 卡铂 700mg d1，Durvalumab 1500mg	cT3N3M1c 广泛期 双锁骨上转移、右髂骨转移、脑转移 PD-L1（-）	IVB期	9.71	6.8	0.43	15.814	2.91	2.33677	1	1	0.55	1.27907	1	440	1023.26	1	9.4	0	0.28	205.8	1	36.8	0	13.5	8.13	5.37	1.51397	0	0.45
吴树良	1261159	男	69	30年 40支/日	1	18773377861	1.48	44	20.0877	1	1	无	2020/04/07	2020.4.10	无	2.3	1	5	1	依托泊苷 0.18g D1-3 卡铂 500mg D1 联合“斯鲁利单抗 1200mg D1”	左上肺 中央型 左侧下颈部淋巴结转移 cT3N3M1b IV期pd-L1(-)	IVA期	10.48	9.088	1.42	6.4	1.392	6.52874	2	1	0.6	0.422535	1	266	187.324	1	9.7	1	16.52	284.9	2	42.6	1	12	11.8	0.2	59	1	1.3
蔡柏文	104571	男	68	36年，每天30根	1	13670269041	1.57	57	23.1247	1	1	无	2020/04/10	2020.4.20	2020.6.1	2.7	1	5.1	1	特瑞普利单抗/安慰剂 240mg d1， 卡铂 601mg d1， 依托泊苷 0.157g d1-d3	右下肺中央型 T4N3M1c IVB期 转移 PD-L1(-);	IVB期	6.77	5.71	0.72	7.93056	1.06	5.38679	2	1	0.72	1	1	228	316.667	1	9.9	0	24	761.9	2	44.9	1	12.85	10.3	2.55	4.03922	2	0.94
周和平	1636137	男	72	长期吸烟，2包/日	1	18929366090	1.63	67	25.2174	1	1	无	2022/05/16	2022.5.17	2022.10.27	5.5	1	8.6	1	依托泊苷 0.18g D1-3 卡铂 500mg D1 联合“斯鲁利单抗 1200mg D1”	左肺下叶 T3N3M1c2 IVB期 胸腰椎、肝、骨盆、左股骨上段转移	IVB期	9.56	8.44	1.31	6.44275	1.12	7.53571	2	1	0.76	0.580153	1	303	231.298	1	8.7	0	15	486.8	2	26	2	13.6882	10.9506	2.73764	4	0	1.17
阳常廷	1724179	男	83	40年 10支/日	1	18073857896	1.6	44	17.1875	0	1	无	2022/09/19	2022.9.29	无	3.5	0	4	0	斯鲁利单抗 300mg d1+依托泊苷 0.14g d1-3+卡铂 400mg d1	右上肺 T2N3M1b IVA期 纵膈、右肺门、 右锁骨上淋巴结、左肾上腺转移	IVA期	13.5	11.2	1.75	6.4	2.3	4.86957	2	1	0.4	0.228571	0	373	213.143	1	9.2	0	6.96	391	2	34.6	0	9	6.84	2.16	3.16667	1	0.58
谈润山	1788982	男	55	30年 40支/日	1	18942513235	1.63	67	25.2174	0	1	无	2023/03/09	2023.3.10	2024.6.11	15.3	0	16.7	0	阿德贝利单抗 1200mg d1 依托泊苷 0.17g d1-3 卡铂（AUC4） 564mg d1	左下肺T3N3M1 IV期左肺门及纵膈淋巴结转移、左侧叶间胸膜转移	IVA期	16.09	11.264	1.76	6.4	4.826	2.33402	0	1	0.58	0.329545	0	318.56	181	1	10.8	1	11.2	209	0	45.9	1	14.29	12.2323	2.05773	5.94455	1	1.36
张功东	1425654	男	49	20年	1	儿子张子佳 18975358258	1.7	68	23.5294	0	1	无	2021/04/27	2021.5.8	暂无	36	0	38	0	依托泊苷 0.1776g d1-3 卡铂 637mg d1 GCP特瑞普利单抗/安慰剂 240mg d1	cT4N2M1a IVA期	IVA期	6.53	4.57	1.68	2.72024	1.96	2.33163	0	0	0.51	0.303571	0	271	161.31	0	9.3	0	3.45	179.3	0	44.8	0	4.69	7.31	-2.62	-2.79008	0	1.31
胡安华	1805314	男	68	有	1	13397695773	1.62	70	26.6728	0	1	有	2023/04/18	2023.4.18	2023.10.30	6.7	1	16.3	1	斯鲁利单抗300mg d1+ 依托泊苷150mg d1-3+卡铂400mg d1	cT2N3M1c IVb期	IVB期	5.83	4.08	1.85	2.20541	1.75	2.33143	0	0	0.52	0.281081	0	334.85	181	1	9.2	0	6.78	240.5	0	38.9	0	12.82	8.89	3.93	2.26209	0	1.87
汤果平	1591940	女	84	无	0	17872389519 女儿18142611343	1.6	55	21.4844	1	2	有	2022/02/14	2022.02.20	2022.12.14	10.1	1	28	1	依托泊苷 0.16g D1-3， 卡铂480mg D1，Durvalumab 1500mg	cT4N3M1 IV期	IVB期	12.62	8.832	1.38	6.4	3.788	2.33157	0	1	0.54	0.391304	0	241	174.638	1	9.2	0	12.3	134.4	0	38.9	1	10.98	5.84	5.14	1.13619	0	0.85
陈德保	1438784	男	75	40年 40支/日	1	18900732795	1.52	39	16.8802	1	2	无	2021/05/19	2021.07.23	2021.12.23	7.3	1	14.5	1	依托泊苷100mg d1-3/ 卡铂300mg d1/ 信迪利单抗200mg	左上肺 cT4N2M1a IVa期	IVA期	13.5	12.5	1.95	6.41026	1	12.5	2	1	1.13	0.579487	1	301	154.359	0	9.2	0	1	245.8	2	39.5	0	15.38	6.74	8.64	0.780093	1	1.13
杨文银	1414398	男	47	20余年， 平均40支/天	1	13595588827 儿子15185617908	1.6	80	31.25	1	1	无	2021/03/26	2021.03.31	2021.09.27	6.2	0	14.5	0	依托泊苷 0.18g d1-d3 卡铂 543mg d1 阿替利珠单抗 1200mg d1	右肺小细胞肺癌T2aN2M1c1 IVB期 广泛期 肝转移	IVB期	9.89	7.87	1.23	6.39837	2.02	3.89604	2	1	0.81	0.658537	0	197	160.163	0	8.5	0	10	254.9	2	44.8	0	4.86	9.38	-4.52	-2.07522	1	1.62
刘建贰	1324755	男	55	40年，80支/天	1	15388928381	1.73	62	20.7157	1	2	无	2020/07/29	2021.12.29	2021.12.27	17.2	0	18.8	0	信迪利单抗 200mg 白蛋白紫杉醇 180mg（D1），	右肺中央型 T4N2M0 IIIB期	IIIB期	4.34	10.26	1.84	5.57609	-5.92	-1.73311	0	0	0.52	0.282609	0	191	103.804	0	9.3	1	5	219.7	0	40.5	0	5.12	4.73	0.39	12.1282	1	1.34
成艾芳	1777317	男	51	30年 60支/日	1	女儿13755157017	1.68	70	24.8016	0	1	无	2023.01.09	2023.02.01	2023.06.26	5.6	0	23.1	0	EC联合a阿替ezolizumab方案治疗 （依托泊苷0.17g 卡铂400mg a阿替ezolizumab 1200mg）	左上肺 cT4N2aM1c2 IVB期	IVB期	20.35	7.31	1.59	4.59748	13.04	0.560583	0	1	0.71	0.446541	1	284	178.616	1	8.7	0	13.4	234.6	0	44.1	1	7.15	6.77	0.38	17.8158	0	1.44
阳召祥	1778601	男	46	40年，3包每天	1	18569483225女儿	1.59	61	24.1288	1	1	无	2022.07.15	2022.08.12	2023.01.30	6.6	0	8	0	依托泊苷+卡铂+ 阿替利珠单抗	T3N3M1 IVB期	IVB期	12.6	7.66	1.61	4.75776	4.94	1.55061	2	1	0.54	0.335404	0	167	103.727	0	9.8	0	1.23	415.6	2	43	0	7.52	5.66	1.86	3.04301	1	1.08
杨谷良	1775675	男	55	30年，1包	1	13007307518	1.64	64	23.7954	0	1	无	2023.01.11	2023.01.14	2023.06.19	5.3	0	10	0	依托泊苷 160mg d1-d3+ 卡铂 350mg d1+ 阿替利珠单抗 1200mg d1	原发性左肺 小细胞癌 T2N0M1 IV期 肝转移 骨转移	IVB期	12.71	10.43	1.54	6.77273	2.28	4.57456	2	1	1.12	0.727273	1	281	182.468	1	9.8	0	14.5	267.8	2	37.1	1	9.45	9.96	-0.51	-19.5294	0	0.95
罗灯华	1771988	男	47	30年，1包半	1	13677427956	1.74	78	25.763	0	1	无	2022.12.21	2023.01.13	2023.04.02	3.6	0	6	0	阿替利珠单抗 1200mg d1 依托泊苷 190mg d1-3 卡铂 700mg d1	原发性左肺 T2bN3M0 IIIB期	IIIB期	6.36	9.98	1.71	5.83626	-3.62	-2.75691	2	0	0.72	0.421053	1	259.92	152	0	9	0	15.6	277.8	2	35.2	1	6	6.56	-0.56	-11.7143	1	1.9
李新义	1777071	男	64	无	0	13035516131	1.61	63	24.3046	1	1	无	2023.01.15	2023.01.20	2023.11.08	9.9	0	22	0	依托泊苷 0.16g d1-d3+ 卡铂 450mg d1+ 阿替利珠单抗 1200mg d1	左上肺 小细胞肺癌 T3N2M1c IVB期	IVB期	6.14	9.42	0.58	16.2414	-3.28	-2.87195	0	0	0.8	1.37931	1	88.16	152	0	9.2	0	16.7	130.1	0	37.1	1	5.71	5.41	0.3	18.0333	0	0.61
杨沅夫	1777336	男	52	10年	1	13755053347	1.72	62	20.9573	1	1	无	2023.01.30	2023.2.10	2023.08.07	6.3	0	15	0	依托泊苷 170mg d1-3 +卡铂 600mg d1 阿替利珠单抗 1200mg d1	左肺门T3N2aM0 IIIA期	IIIA期	9.24	8.76	1.2	7.3	0.48	18.25	0	0	0.38	0.316667	0	182.4	152	0	7.6	0	17.8	205.8	0	37.6	1	5.17	8.95	-3.78	-2.36772	0	1.15
涂生莲	1777525	女	53	无	0	18075322120	1.63	58	21.83	0	1	无	2023.02.05	2023.2.10	2023.08.23	6.6	0	24	0	ec+阿替:阿替利珠单抗	右肺T2bN2aM0 IIIA期	IIIA期	12.31	9.86	0.81	12.1728	2.45	4.02449	0	1	0.9	1.11111	1	146.61	181	1	9.6	0	18.9	206.3	0	41.5	1	7	6.98	0.02	349	1	0.85
孟交玉	1782560	男	81	20年，一包每天	1	15289826782	1.58	52	20.83	1	1	无	2023.02.02	2023.2.13	2023.08.29	6.9	0	22	0	EC+阿替利珠单抗 4个周期后，单阿替4次	右肺T2aN2aM1c2 IVB期	IVB期	22.65	9.41	1.49	6.31544	13.24	0.710725	1	1	1.29	0.865772	1	173	116.107	0	9.5	0	10.11	299	1	39.6	1	18.97	5.58	13.39	0.416729	0	0.9
刘则元	1771862	男	64	30年，2包/天	1	18976998276	1.69	62	21.7079	0	1	无	2022.12.29	2023.1.29		7.5	0	24	0	EC+阿替利珠单抗方案	右上肺T1bN3M1c1IVB期	IVB期	9.35	17.54	1.13	15.5221	-8.19	-2.14164	0	0	0.86	0.761062	1	171.76	152	0	9.1	0	11.22	190	0	36.6	1	12.14	11.17	0.97	11.5155	0	1.13
陈正平	1783044	男	67	50年，3包	1	13638544785	1.62	64	24.3865	2	1	无	2023.01.28	2023.02.21	2023.05.22	3.8	1	5	1	依托泊苷 0.14g d1-d3 ivg阿替阿替； 卡铂 370mg d1 ivg阿替阿替； 阿替利珠单抗 1200mg d1 ivg阿替阿替	右肺T4N2bM0 IIIB期	IIIB期	14	8.7	1.37	6.35036	5.3	1.64151	2	1	1.59	1.16058	1	247.97	181	1	10	1	12.33	856	2	37.8	1	17.88	9.6	8.28	1.15942	1	1.19
肖立新	1781294	男	51	20年，1包	1	13317376878	1.79	82	25.5922	1	1	无	2023.02.06	2023.02.17	2023.12.18	10.5	1	16	1	EC+阿替利珠单抗	左肺T4N2bM1c1 IVB期	IVB期	6.62	7.55	1.99	3.79397	-0.93	-8.11828	0	0	0.63	0.316583	0	288.55	145	0	9.7	0	9.87	167	0	39.7	0	6.91	9.4	-2.49	-3.7751	0	1.21
唐方荣	1780217	男	66	40年	1	13974461919	1.66	83	30.1205	1	1	无	2023.02.08	2023.02.20	2023.11.28	9.8	1	24	1	EC+阿替利珠单抗 4个周期	右肺T1cN2bM1c1 IVB期	IVB期	4.52	8.59	1.64	5.2378	-4.07	-2.11057	0	0	0.3	0.182927	0	190	115.854	0	8.2	0	4.56	151.9	0	32.1	0	2.98	7.26	-4.28	-1.69626	0	2.56
李农春	1783713	男	73	40年	1	13122229198	1.68	74	26.2188	1	1	无	2023.02.08	2023.02.20	暂无	22	0	22	0	EC+阿替 4个周期	右肺T1cN3bM1c1 IVB期	IVB期	6.62	9.34	1.59	5.87421	-2.72	-3.43382	0	0	0.48	0.301887	0	251	157.862	0	9.7	0	7.89	235.2	0	36.6	0	5.97	5.61	0.36	15.5833	0	1.37
邓彰兴	1785593	男	70	50年，1包	1	13787792931	1.75	74	24.1633	1	1	无	2023.02.13	2023.02.17	2023.10.07	7.9	0	10.5	0	EC+阿替利珠单抗4个周期	cT4N3M1 骨转移	IVB期	4.24	14.96	1.73	8.6474	-10.72	-1.39552	2	0	0.54	0.312139	0	308	178.035	1	9.9	0	2.34	1057	2	42.8	0	4.85	6.11	-1.26	-4.84921	0	1.59
杨修恒	1787027	男	82	50年	1	18397317971	1.59	51	20.1733	1	1	无	2023.02.14	2023.02.23	2023.06.01	3.6	0	5.9	0	EC+阿替利珠单抗4个周期	左肺T3N3bM1c2 IVB期	IVB期	10.63	7.04	1.16	6.06897	3.59	1.961	2	1	0.71	0.612069	1	310	267.241	1	8.3	0	16	691	2	25.1	2	6.97	7.58	-0.61	-12.4262	1	1.61
曹学元	1758797	男	67	30年，3包	1	15367913543	1.58	57	22.8329	0	1	无	2022.11.15	2023.01.06	2023.04.24	5.3	0	12.9	0	斯鲁利单抗300mg d1 依托泊苷0.157mg d1-3 顺铂35mg d1-3 4个周期	cT4N2M1a IVA期	IVA期	12	10.26	1.62	6.33333	1.74	5.89655	1	1	0.66	0.407407	0	223	137.654	0	8.8	0	5.67	321	1	37.8	0	5.43	4.84	0.59	8.20339	1	1.83
罗友才	1766008	男	74	35年	1	13628694982	1.64	83	30.8596	1	1	无	2022.12.15	2023.1.11	2023.5.15	4.3	1	12	1	EC+阿替利珠单抗4个周期	右肺中央型 T4N2Mx IV期？ （右肺动脉受侵，右肺门及 纵膈内多发淋巴结转移， 肝转移？）	IVB期	9	7.31	1.11	6.58559	1.69	4.32544	1	1	2.26	2.03604	1	242	218.018	1	9.4	0	8.9	234.5	1	36.9	0	4.37	6.3	-1.93	-3.26425	0	2.26
涂志明	1298808	男	59	20年，1包半	1	15973780539	1.6	84	32.8125	0	2	无	2020.07.10	2020.08.25	2020.12.15	5.3	1	8	1	EC+阿替利珠单抗	右上肺T2N1M2 IVB期	IVB期	12.08	16.43	3.02	5.4404	-4.35	-3.77701	2	0	1.12	0.370861	0	343	113.576	0	11	1	13.44	398.1	2	47.5	1	2.4	6.71	-4.31	-1.55684	1	0.52
黄佳玉	1349050	女	78	无	1	15574668709	1.54	51	21.5045	1	1	无	2020.10.22	2020.11.06	2021.4.12	5.7	0	7	0	EC+阿替利珠单抗6个周期	右上肺T4N2aM1c1 IVB期	IVB期	11.7	9.75	1.23	7.92683	1.95	5	2	1	0.45	0.365854	0	296	240.65	1	9.6	0	15.44	260	2	40.5	1	23.55	8.16	15.39	0.530214	1	1.41
曾效云	1373374	男	66	50年	1	15388948768	1.66	66	23.9512	2	2	无	2020.12.24	2021.01.22	2021.06.19	5.9	1	10.3	1	EC+阿替利珠单抗	右肺T4N2aM0 IIIB期	IIIB期	12.33	14.15	1.32	10.7197	-1.82	-7.77473	1	1	0.92	0.69697	1	310	234.848	1	8.5	0	17	174.7	1	21.8	2	8.65	5.14	3.51	1.46439	0	1.12
刘平元	1769451	男	47	30年，20支/天	1	15197796968	1.7	55	19.0311	1	1	无	2022.12.11	2023.1.12	2.5	2.5	1	13	1	斯鲁利单抗 300mg d1 依托泊苷 0.16g d1-3 卡铂（AUC5） 570mg d1	T4N3M1a IVA期	IVA期	6.29	8.26	0.81	10.1975	-1.97	-4.19289	2	1	0.55	0.679012	1	263	324.691	1	9.6	0	14.55	352.1	2	36.1	1	14.2	12.96	1.24	10.4516	0	1.63
方兴国	1771550	男	47	40年，10支/天	1	17700220218	1.68	68	24.093	0	1	无	2022.12.30	2023.1.12	2023.3.14	2.5	1	1900-01-08 14:24:00	1	EP+阿替	T2bN1M0 IIB期	IIIA期	11.25	9	1.23	7.31707	2.25	4	0	1	0.47	0.382114	0	326	265.041	1	9.1	1	26.13	228.2	0	37	1	13.3659	10.6927	2.67318	4	0	1.58
陈军	1774938	男	51	无	0	15600223300	1.7	71	24.5675	0	1	无	2023.1.17	2023.1.31	2023.7.6	5.7	0	19	0	阿得贝利+卡铂+白紫 6.13改卡铂为奈达铂+阿得+白紫 2024.5.25	左上肺中央型 T3N1M1c IVb期	IVB期	13.2	12	1.12	10.7143	1.2	10	1	1	1.02	0.910714	0	265	236.607	1	8.9	1	1.01	225	1	40.5	0	13.6012	10.881	2.72024	4	2	1.64
孙茂林	1770234	男	73	40年，1包/天	1	18975106737	1.65	58	21.3039	1	1	无	2022.12.22	2023.1.11	暂无	24	1	24	1	EP+度伐利尤	（左上肺）T4(血管受侵) N3M1a IV期 胸膜转移	IVA期	13.87	11.456	1.79	6.4	2.414	4.74565	2	1	0.45	0.251397	0	351	196.089	1	10	1	2.02	285.3	2	35.6	0	14.6	11.68	2.92	4	0	1.71
谢业统	1769305	男	82	30年，10支/天	1	15197190846	1.55	44	18.3143	1	1	无	2022.12.30	2023.1.14	2023.6.7	5.3	1	24	1	EC+阿替	T4N3M1aIVb期	IVB期	5.02	4.62	0.84	5.5	0.4	11.55	2	0	0.75	0.892857	1	267	317.857	1	8.4	1	18	352.7	2	17.4	2	7	9.9	-2.9	-3.41379	1	1.1
甘志祥	1773192	男	64	30年，2包/天	1	13871231412	1.78	75	23.6713	0	1	无	2022.8.1	2022.8.10	2023.3.29	8	1	18	1	EC+斯鲁利	T2aN2aM1aIVA期	IVA期	5.9	4.13	0.96	4.30208	1.77	2.33333	0	0	0.9	0.9375	1	139.2	145	0	9.2	1	19	241.4	0	30	2	16.57	4.13	12.44	0.331994	0	2.04
孙国兵	1773608	男	67	36年，20支/天	1	18142663920	1.72	75	25.3515	1	1	无	2022.12.20	2023.1.14	2024.5.10	16.9	1	24	1	EP+度伐利尤	右上肺 T4N2M1C IVB 肝转移 小细胞癌	IVB期	12.51	8.76	1.7	5.15294	3.75	2.336	1	0	0.85	0.5	1	246	144.706	0	10.8	1	17.56	267	1	42.5	1	14.35	11.48	2.87	4	0	1.68
陈伏生	1771125	男	63	40年，1包/天	1	13877286872	1.66	68	24.677	1	1	无	2023.1.4	2023.01.10	2023.10.30	10	1	13.5	1	EC+斯鲁利	右上肺 T3N3M1 IV期 肝转移	IVB期	15.51	12.608	1.97	6.4	2.902	4.34459	2	1	0.96	0.48731	1	234	118.782	0	9.8	1	3.03	250.5	2	38.1	0	9	8.3	0.7	11.8571	1	1.6
曾庆寿	1776916	男	75	40年，1包/天	1	13874847484	1.6	58	22.6562	1	1	无	2022.12.30	2023.01.30		12	1	20	1	EP+度伐利尤	右下肺 T2N1M1b IVA期 腹膜后淋巴结转移	IVA期	10.79	7.552	1.18	6.4	3.238	2.3323	0	1	0.46	0.389831	0	171.1	145	0	9.7	0	15.66	111.3	0	44.8	1	5.48	2.26	3.22	0.701863	0	1.34
高桂超	1773545	男	48	20余年， 平均40支/天	1	17872268968	1.63	60	22.5827	1	1	无	2023.01.04	2023.01.16	2023.7.20	6.6	1	8.3	1	EP+度伐利尤	左上肺中央型 T1cN3M0 IIIB期	IIIB期	5.21	5.01	2.13	2.35211	0.2	25.05	2	0	0.44	0.206573	0	300	140.845	0	8.5	0	4.04	245.1	2	41.6	0	8.66	6.93	1.73	4.00578	2	1.89
刘桂花	1179820	女	75	无	0	15173184523	1.48	52	23.74	1	2	无	2019.5.18	2019.6.22	2020.3.27	10.5	0	12.5	0	EP+帕博利珠	T3N2bM1c IVB期	IVB期	4.58	2.98	2.01	1.48259	1.6	1.8625	0	0	0.52	0.258706	0	325	161.692	0	8.9	0	5.05	168.5	0	47.3	0	3.71	1.11	2.6	0.426923	0	1.01
李吉平	1233397	男	47	30年，30支/天	1	13787108272	1.61	65	25.0762	1	1	无	2019.11.1	2019.12.11	2020.4.28	6	1	9	1	EC+特瑞普利	右肺 T4N3M1b IVA期	IVA期	14.14	10.816	1.69	6.4	3.324	3.25391	2	1	0.41	0.242604	0	349	206.509	1	9.6	0	6.06	429.6	2	58.9	0	21.11	12.42	8.69	1.42923	0	1.2
苏志良	1235038	男	60	50年，1包/天	1	14789897751	1.56	62	25.4767	1	2	无	2019.11.1	2020.1.8	2020.5.1	6.1	1	17	1	EC+特瑞普利	右肺 T34N3M1c IVB期	IVB期	15.5	11.4	1.8	6.33333	4.1	2.78049	2	1	0.83	0.461111	0	186	103.333	0	9	0	13.39	401.9	2	41.4	1	13.2567	10.6054	2.65134	4	1	1.56
阳起明	1254711	男	80	20年，20支/天	1	15873737141	1.55	46	19.1467	0	1	无	2020.2.20	2020.3.7	2020.7.23	5.1	0	6	0	EC+信迪利	右肺 T1cN3M1c2 IVB期	IVB期	3.96	3.4	0.79	4.3038	0.56	6.07143	2	0	0.37	0.468354	1	314	397.468	1	9	0	64.9	847.8	2	40.6	1	6.22	4.04	2.18	1.85321	1	1
周后飞	1258161	男	85	无	0	13975892502	1.69	58	20.3074	2	1	无	2020.3.24	2020.4.9	2020.9.16	5.9	0	9	0	EC+阿替利珠单抗6个周期	右上肺 cT4N2M1 IVB期	IVB期	5.25	4.25	0.75	5.66667	1	4.25	2	0	0.37	0.493333	1	143	190.667	1	9.8	0	96.7	3381.8	2	36.4	1	8.51	6.51	2	3.255	2	1.64
何查林	1254949	男	65	无	0	13973312930	1.7	52	17.9931	1	1	无	2020.2.26	2023.3.25	2023.6.3	3.8	0	6	0	EC+阿替 3个周期	左上肺 T4N2bM1c2 IVB期	IVB期	7.83	5.09	1.12	4.54464	2.74	1.85766	0	0	0.44	0.392857	0	146	130.357	0	9.2	0	10.15	207.6	0	39.1	1	6.23	5.35	0.88	6.07955	2	1.19
李门友	1253918	男	46	10年，1.5包/天	1	18775769720	1.57	58	23.5304	0	1	无	2020.03.06	2020.3.17	2020.8.9	5.2	0	20	0	EC+度伐利尤10周期 脑部放疗一次	T2aN2bM1a IVA期	IVA期	9.26	6.02	1.23	4.89431	3.24	1.85802	0	0	0.37	0.300813	0	178.35	145	0	8.8	0	7.07	189.6	0	35.2	0	16.34	9.32	7.02	1.32764	0	1.12
吴凤英	1254173	女	56	无	0	18711227407	1.53	63	26.9127	1	1	无	2020.2.27	2020.3.5	2020.7.2	4.2	0	5	0	EC+阿特珠 6个周期	T4N3M1b IVA期	IVA期	14.33	9.315	1.35	6.9	5.015	1.85743	0	1	0.18	0.133333	0	418	309.63	1	8.4	0	20	182.1	0	22.1	2	5.8	2.47	3.33	0.741742	0	1.19
段立红	1273365	男	52	30余年，约2包/天	1	13570299077	1.61	57	21.9899	1	1	无	020.4.24	2020.5.11	2020.9.25	5.1	0	7	0	EC+阿替利珠单抗6个周期	cT4N3M1 IVB期	IVB期	8.65	5.62	1.32	4.25758	3.03	1.85479	0	0	0.67	0.507576	1	338	256.061	1	9.3	0	19.18	168.2	0	41	1	8.4	4.16	4.24	0.981132	0	1.46
刘谷升	1272760	男	56	20余年，15支/天	1	13739083568	1.73	62	20.7157	1	1	无	2020.3.1	2020.4.30	2020.7.14	4.5	0	6.1	0	EC+阿替利珠单抗3个周期	T2bN1M1c2 IVB期	IVB期	14.48	11.04	1.6	6.9	3.44	3.2093	2	1	0.71	0.44375	1	454	283.75	1	9.3	0	8.08	288.3	2	41.2	0	1.22	0.79	0.43	1.83721	1	0.14
肖硕军	1275280	男	57	10余年，3包/天	1	13973581402	1.63	77	28.9811	1	1	无	2020.4.1	2020.9.22	2020.10.22	6.8	0	10.8	0	EP+阿替利珠单抗5个周期 改阿替1个周期后进展	T2bN2bM1c2 IVB期	IVB期	7.45	4.84	0.93	5.2043	2.61	1.85441	0	0	0.78	0.83871	1	336	361.29	1	8.6	0	10.4	159.7	0	45.5	1	10.25	5.36	4.89	1.09611	0	0.91
罗秀志	1106489	男	64	40年，2包/天	1	13811680744	1.65	70	25.7117	1	1	无	2018.10.16	2018.11.2	2019.02.27	4.5	0	5	0	依托泊苷：0.17g+卡铂536mg+ Durvalumab 1500mg	T1bN2bM1c2 IVB期	IVB期	6.31	5.727	0.83	6.9	0.583	9.82333	2	1	0.66	0.795181	1	288	346.988	1	9	0	15	282	2	40	1	6.46	4.2	2.26	1.85841	1	0.72
谢高勇	1091859	男	50	30余年，约1包/天	1	13762451524	1.65	60	22.0386	1	1	无	2018.8.18	2018.11.2	2019.9.9	12.9	0	14.8	0	Durva+阿替reme+EC方案: Durva 1500mg d1+阿替reme 75mg d1+依托泊苷 168mg d1-3+卡铂 587mg d1	cT1N3M1b IVa期	IVA期	7.03	4.57	2.42	1.88843	2.46	1.85772	0	0	0.64	0.264463	0	177	73.1405	0	9.1	0	9.09	220.9	0	42.8	0	4.6	2.99	1.61	1.85714	1	1.97
吴国云	1324151	男	51	20余年，2包/天	1	18229723339	1.72	67	22.6474	1	1	无	2020.8	2020.9.8		7	0	10.2	0	EP+阿替利珠单抗1个周期，IC+阿替利珠单抗5个周期	T3N2bM1c2 IVB期	IVB期	15.76	11.868	1.72	6.9	3.892	3.04933	2	1	1.34	0.77907	1	118	68.6047	0	10	0	58.4	280	2	35	1	5.28	3.43	1.85	1.85405	1	2.79
刘永秋	1407196	男	47	20+年	1	15173880678	1.73	78	26.0617	1	1	无	2021.03.10		2021.6.25	3.6	0	8.3	0	EC+阿替利珠单抗4个周期	T3N2bM1c1 IVB期	IVB期	4.68	3.04	1.32	2.30303	1.64	1.85366	0	0	0.42	0.318182	0	191.4	145	0	8.5	0	16.77	154.8	0	47.5	1	2.7	2.08	0.62	3.35484	1	1.18
苏国祥	1432414	男	65	40+年，1包/天	1	15388079939	1.63	60	22.5827	1	1	无	2021.04.15	2021.4.27	2021.8.28	4.5	1	6	1	EC+阿替利珠单抗4个周期，阿替2个	T3N3M1c1IVB期	IVB期	9.66	7.66	1.11	6.9009	2	3.83	2	1	0.76	0.684685	0	130	117.117	0	9.2	0	1.1	351.6	2	44.1	0	12.26	7.97	4.29	1.85781	1	1.05
杨臣倦	1439024	男	54	40年，1-2包/天	1	18163634603	1.72	62	20.9573	1	1	有	2021.5.7	2021.5.21	2021.8.31	3.9	1	8.7	1	EC+阿替利珠单抗5个周期	T3N2bM1c1 IVB期	IVB期	17.94	11.661	1.69	6.9	6.279	1.85714	0	1	0.38	0.224852	0	305.89	181	1	9.4	0	2.2	163.4	0	43.5	0	14.6726	11.7381	2.93451	4	0	1.34
王光炯	1472448	男	48	40年，30支/天	1	18507496031	1.72	67	22.6474	1	1	无	2021.6.17	2021.8.24	2021.11.25	5.4	1	12	1	EC+阿替利珠单抗5个周期	T3N3M1c IVb期	IVB期	6.58	4.28	1.69	2.53254	2.3	1.86087	0	0	0.54	0.319527	0	245.05	145	0	9.3	0	2.48	225.5	0	38.4	1	6.17	2.71	3.46	0.783237	0	1.03
刘龙求	1506221	男	47	20余年，约1包/日	1	18794726754	1.54	52	21.9261	1	1	无	2021.06		2022.07	11	1	12	1	EC+阿替利珠单抗5个周期	T4N3M0	IIIC期	15	12.351	1.79	6.9	2.649	4.66251	2	1	0.47	0.26257	0	392	218.994	1	10.5	1	17.88	623.4	2	39.4	1	8.5	7.88	0.62	12.7097	1	1.51
朱志武	1551446	男	51	20+年，3-6根/天	1	18890396843	1.7	71	24.5675	1	1	无	2021.11		2022.06	6	1	7	1	EC+阿替利珠单抗5个周期	T2aN3M1c2 IVB期	IVB期	5.66	4.55	2.55	1.78431	1.11	4.0991	2	0	0.67	0.262745	0	264	103.529	0	8.9	0	3.3	314.7	2	46.6	0	12.23	6.65	5.58	1.19176	0	2.22
饶琉逑	297823	女	80	无	0	15173869322	1.49	35	15.7651	1	1	无	2023.6.15		2023.8.10	1.9	1	3.7	1	EC+阿替利珠单抗5个周期	T2bN3M1c2 IVB期	IVB期	9.95	8.09	0.46	17.587	1.86	4.34946	2	1	0.27	0.586957	1	110	239.13	1	11.8	1	20	450.6	2	21.2	2	28.38	17.15	11.23	1.52716	0	0.92
肖高才	1148616	男	69	无	0	18570325820	1.6	57	22.2656	0	2	无	2019.3.7	2019.6.13		21	1	23	1	2020.3.28-安罗替尼+替莫唑胺2020.9.8 2020.10.20E+阿替利珠		IVB期	8.62	7.23	1.26	5.7381	1.39	5.20144	2	0	0.86	0.68254	1	182.7	145	0	9.4	0	4.4	258.7	2	42.2	0	9.23	4.7	4.53	1.03753	0	1.2
陈建新	1182377	男	46	30余年，约2包/天	1	18711173073	1.68	58	20.5499	1	1	无	2019.6.24	2019.7.4	2019.9.24	3	1	8.7	1	2020.2.4-阿替利珠单抗+白紫 2020.3.2进展 可考虑长春瑞滨	T4N3M1 IV期	IVB期	15	12.351	1.79	6.9	2.649	4.66251	2	1	1.1	0.614525	1	292	163.128	0	9.2	0	5.16	423.4	2	41.4	1	3.09	2.01	1.08	1.86111	1	1.88
毛秋元	1170692	男	69	40年，10支/天	1	18974660437	1.63	60	22.5827	0	2	无	2019.5	2019.7.19	2020.3	9	1	7.8	1	EC+阿替利珠单抗4个周期 阿替利珠单抗3个周期	T4N3M1c2 IVB期	IVB期	13.35	10.304	1.61	6.4	3.046	3.3828	2	1	0.51	0.31677	0	251	155.901	0	9.3	0	5.5	427.2	2	37.5	0	6.37	4.14	2.23	1.8565	1	2.12
李文革	1774303	男	56	20余年，1包/天	1	13548737748	1.69	69	24.1588	1	1	无	2023.1.7	2023.1.29		3.5	1	5	1	EC+特瑞普利 2个	T2N3M1a	IVA期	7.36	6.41	0.86	7.45349	0.95	6.74737	2	1	0.96	1.11628	1	253	294.186	1	10.1	0	23	317.3	2	26.7	2	11.43	6.13	5.3	1.1566	0	0.8
陈孟武	1776009	男	68	40年，3包/天	1	18711056252	1.6	67	26.1719	1	1	无	2023.1.17	2023.2.1	2023.7.14	5.9	1	1900-01-11 19:12:00	1	EP+斯鲁利 6个	cT4N2M1b IVa期	IVA期	8.08	6.88	1.98	3.47475	1.2	5.73333	2	0	0.54	0.272727	0	401	202.525	1	8.5	0	23.74	251.8	2	37.6	1	6.43	4.83	1.6	3.01875	1	1.46
艾云秀	1776463	女	53	无	0	17847569957	1.6	52	20.3125	0	1	有	2023.1.6	2023.2.3	2023.9.6	8	1	13	1	EC+斯鲁利	T4N3M0	IIIC期	8.43	5.48	1.84	2.97826	2.95	1.85763	0	0	0.61	0.331522	0	279.68	152	0	9.6	1	6.6	215.3	0	36.2	0	9.75	6.34	3.41	1.85924	0	1.8
李太平	1779782	女	47	无	0	18973873448	1.6	57	22.2656	1	1	无	2022.12	2023.02.03	2023.3.23	2	1	5.8	1	EP+度伐利尤	T1cN3M1c IVB期	IVB期	4.68	4.67	1.09	4.2844	0.01	467	2	0	0.8	0.733945	1	340	311.927	1	9.2	0	29	326.7	2	18.6	2	11.86	9.01	2.85	3.1614	2	1.38
欧汉春	1751537	男	57	2	0	17374458139	1.6	60	23.4375	1	1	有	2022-11-17		6.3	6.3	0	25	0	EP+斯鲁利 6个+斯鲁利5个	cT4N3M1b IVa期	IVA期	6.31	4.1	1.57	2.61146	2.21	1.8552	0	0	0.54	0.343949	0	238.64	152	0	8.9	1	14.3	234.6	0	40.2	1	9.49	6.17	3.32	1.85843	0	1.93
黄香英	1776697	女	76	2	0	18627652468	1.52	50	21.6413	1	1	无	2023/2/1		2023.5.4	3.1	1	5	1	EC+斯鲁利4个	T4N3M1a IVA期	IVA期	10.93	7.104	1.11	6.4	3.826	1.85677	0	1	0.57	0.513514	1	213	191.892	1	12.5	1	36	175.7	0	33.4	2	6.43	4.18	2.25	1.85778	1	1.21
谢友文	1776072	男	78	1	1	13627396699	1.68	68	24.093	1	1	无	2023-01-31		2023.3.20	2	1	11.2	1	EP+斯鲁利 2个	T3N3Mx IIIB期	IIIB期	8.42	5.47	1.44	3.79861	2.95	1.85424	0	0	0.33	0.229167	0	312	216.667	1	9.8	1	7.7	225.1	0	35.9	0	4.31	2.8	1.51	1.8543	0	1.09
唐振桃	1749136	男	68	1	1	17347007777	1.57	52	21.0962	1	1	无	2022-11-02		2023.5.9	6.3	1	18.5	1	依托泊苷 110mg ivg阿替阿替 d1、d2、d3 顺铂 40mg ivg阿替阿替 d1、d2、顺铂 30mg ivg阿替阿替 d3 恩沃利单抗 200mg 皮下注射一支 d1	cT4N3M1c IVB期	IVB期	10.78	8.96	1.4	6.4	1.82	4.92308	1	1	0.56	0.4	1	212.8	152	0	9.3	0	8.8	237.9	1	1.05	0	9.51	7.48	2.03	3.68473	2	0.87
瞿水根	1754793	男	48	2	0	13167428435	1.62	69	26.2917	0	1	无	2022-11-18		2023.2.27	3.4	1	8.4	1	EP+斯鲁利 4个	cT4N3M1	IVA期	13.46	10.115	1.19	8.5	3.345	3.02392	0	1	0.48	0.403361	1	148	124.37	0	7.9	0	11.95	233.8	0	40	1	20.51	13.33	7.18	1.85655	1	1.19
张喜美	1771278	女	51	2	0	13707315569	1.6	70	27.3438	1	2	无	2022-08-26	2022.10.30		7.4	0	24	0	EP+斯鲁利 6个 单斯鲁利16个	T3N3M1C2	IVB期	4.63	3.01	1.85	1.62703	1.62	1.85802	0	0	0.4	0.216216	0	287	155.135	0	9.7	0	9.9	183.3	0	41.8	0	3.49	2.27	1.22	1.86066	0	2.11
彭国谱	1762080	男	46	1	1	15616047621	1.6	85	33.2031	1	1	有	2022-12-09		2023.12.4	12	1	24	1	2023.12.08 白紫+奈达铂+度伐 直到2024.3.1 3.1-3.15脑转移姑息性放疗 4.2度伐 4.19托泊替康 4.29度伐 5.24托泊+奈达铂+度伐	T3N2M1 IV期	IVA期	6.86	4.46	1.37	3.25547	2.4	1.85833	0	0	0.67	0.489051	1	209	152.555	0	9.5	1	1.11	216.7	0	41.7	0	6.06	4.59	1.47	3.12245	1	1.88
李右度	1759213	男	50	1	1	13755555611	1.75	83	27.102	0	1	有	2022-12-01		2023.10.9	10.4	1	21.6	1	阿替+EP	T4N2M0 IIIB期	IIIB期	13	11.5	1.77	6.49718	1.5	7.66667	2	1	0.51	0.288136	0	269.04	152	0	9.9	0	2.22	256.8	2	38.1	0	14.9726	11.9781	2.99452	4	0	1.38
李石根	1754613	男	54	1	1	18274424767	1.67	75	26.8923	1	1	无	2022-11-24		8.5	8.5	0	13	0	EC+斯鲁利4个	T4N2Mx ⅢB期	IIIB期	15.8	11.6	1.77	6.55367	4.2	2.7619	0	1	0.53	0.299435	0	269.04	152	0	9.4	0	3.33	162.3	0	42.9	0	4.26	2.77	1.49	1.85906	0	1.38
王少国	1770607	男	75	1	1	15673180688	1.7	51	17.6471	1	1	有	2023-01-11		2023.6.23	5.4	1	6	1	EC+阿替4个	T3N2M0 IIIA期	IIIA期	3.29	2.91	2.59	1.12355	0.38	7.65789	2	0	0.65	0.250965	0	273	105.405	0	9	0	4.44	290.7	2	40.8	0	3.22	2.09	1.13	1.84956	0	2.11
杨秀燕	1771565	男	55	1	1	13789336197	1.7	80	27.6817	1	1	有	2023-01-02		2023.7.2	6	1	22	1	EP+阿替4个 阿替1个	T3N3M0 IIIC期	IIIC期	10.64	5.85	1.15	5.08696	4.79	1.22129	0	0	0.44	0.382609	0	174.8	152	0	10.7	1	37	187.4	0	33.1	2	15	13	2	6.5	0	1.77
陈兴龙	1565577	男	85	1	1	13507401444	1.69	79	27.6601	1	1	无	2022-01-07		2023.5.22	16.7	0	23	0	EC+斯鲁利6个	T2N3M1c IV期	IVB期	5.03	4.14	1.32	3.13636	0.89	4.65169	2	0	0.33	0.25	0	203	153.788	0	7.4	0	5.55	671.9	2	47.9	0	2.46	1.6	0.86	1.86047	1	1.05
石腊保	1770133	男	60	1	1	18907438081	1.65	68	24.977	1	1	无	2023-01-05		2023.9.5	8	0	13	0	EC+度伐利尤6个	cT2bN3M1a IVA期	IVA期	9.6	5.28	2.1	2.51429	4.32	1.22222	0	0	0.72	0.342857	0	394	187.619	1	9.4	0	6.66	216.4	0	37.8	0	6.98	2.55	4.43	0.575621	0	2.12
梁长付	1760737	男	57	1	1	15570816297	1.65	77	28.2828	1	1	无	2022-12-14	2023.8.1	2023.3.30	3.5	1	5.2	1	EC+斯鲁利4个	cTxN3M1c IVA	IVA期	14.8	10.8	1.39	7.76978	4	2.7	0	1	0.61	0.438849	0	267	192.086	0	9.1	1	7.77	205.2	0	37.9	0	12.4472	9.95779	2.48945	4	0	1.13
肖世群	1769629	男	52	1	1	13762885911	1.67	74	26.5338	1	1	无	2023/1/4		2023.7.17	6.5	0	18.3	0	EC+斯鲁利6个 斯鲁利1个	T4N3M0 IIIc期	IIIC期	9.02	4.96	2.32	2.13793	4.06	1.22167	0	0	0.68	0.293103	0	272	117.241	0	10	0	8.88	171.2	0	37.9	0	5.63	2.79	2.84	0.982394	0	1.79
龙国平	1746685	男	52	1	1	13527765621	1.7	55	19.0311	1	1	有	2022-11-09		2023.6.28	7.7	1	24	1	EC+斯鲁利6个	cT4N3M1c	IVB期	15.61	8.585	1.01	8.5	7.025	1.22206	0	1	0.24	0.237624	0	153.52	152	0	9.6	1	18.99	233	0	39.2	1	14.22	12.1741	2.04588	5.95055	0	1.3
张小平	1734943	男	48	1	1	15774185020	1.68	78	27.6361	1	1	无	2022-10-18			4.3	1	15	1	EP+斯鲁利4个	T1cN2bM0 IIIA期	IIIA期	15	10.77	1.09	9.88073	4.23	2.5461	0	1	0.54	0.495413	0	170	155.963	0	9.7	1	9.99	221	0	44.9	0	7.88	3.51	4.37	0.803204	0	1.96
周军	1748978	男	54	1	1	13873231919	1.72	83	28.0557	1	1	无	2022-11-10		2023.8.8	9	1	24	1	EC+度伐利尤2个	T4N3M0 IIIC期	IIIC期	9.09	5	0.77	6.49351	4.09	1.22249	0	1	0.29	0.376623	0	255	331.169	1	10.3	1	38	200.6	0	32.3	2	8	3.56	4.44	0.801802	0	0.6
张红华	1749251	男	48	1	1	13632807559	1.7	84	29.0657	1	1	有	2022-11-14		2023.4.24	5.4	1	16	1	EC+度伐利尤3个	T4N3M1b ⅣA期	IVA期	12.55	11.305	1.33	8.5	1.245	9.08032	2	1	0.14	0.105263	0	240.73	181	1	11.5	1	10.5	265.9	2	43.8	1	9.88	6.42	3.46	1.85549	0	0.47
付超华	1755486	男	72	1	1	15200227715	1.7	76	26.2976	1	1	无	2022-11-22		2023.3.22	5	1	10.8	1	EP+斯鲁利	cT4N3 M1aIV期	IVA期	6.06	4.71	0.75	6.28	1.35	3.48889	2	0	0.57	0.76	1	120.75	161	0	9.1	0	39	381.3	2	18.6	2	6.85	2.68	4.17	0.642686	0	1.22
蒋进保	1757069	男	74	1	1	18143312970	1.65	57	20.9366	1	1	有	2022-11-25	0		3.5	1	1900-01-04 19:12:00	1	EP+特瑞普利	T2N3M1c IVB期	IVB期	4.85	4.04	2.03	1.99015	0.81	4.98765	2	0	0.61	0.300493	0	109	53.6946	0	9.9	1	11.5	1120.7	2	36.2	1	10.04	8.95	1.09	8.21101	2	0.98
裴长生	1481383	男	64	1	1	13017183536	1.62	66	25.1486	1	1	无	2022-05-11		2023.4.12	11.2	0	23	0	EC+斯鲁利 8个	cT3N2M1b IVb期	IVB期	4.18	2.3	1.41	1.63121	1.88	1.2234	0	0	0.27	0.191489	0	120	85.1064	0	9.7	0	1.5	143.9	0	37.1	0	6.53	2.88	3.65	0.789041	0	2.13
奉明祁	1765028	男	64	1	1	18153356269	1.68	60	21.2585	1	1	无	2022-12-21		2023.3.30	3.3	0	6	0	EC+阿替 4个	T4N1M1a IV期	IVA期	9	8.61	1.26	6.83333	0.39	22.0769	2	1	1.94	1.53968	1	205	162.698	0	9.2	0	45	575.3	2	22.5	2	8.95	6.95	2	3.475	2	1.76
肖调富	1758736	男	81	1	1	18975481023	1.62	67	25.5296	1	1	无	2022-11-23		2024.5.11	17.8	1	24	1	EC+阿替 3个 阿替18个	T4N3M1c2 IVB期	IVB期	10.62	9.69	1.14	8.5	0.93	10.4194	2	1	0.67	0.587719	1	183.54	161	0	9.4	1	12.5	573.7	2	40.4	1	17.94	12.96	4.98	2.60241	0	0.98
潘日升	1760952	男	85	1	1	15197087756	1.62	60	22.8624	0	1	无	2022-11-29		暂无	23	0	25	0	EC+阿替 4个 阿替23个	T1cN3M1a IVB期	IVB期	5.13	2.82	1.09	2.58716	2.31	1.22078	0	0	0.45	0.412844	1	175.49	161	0	9.1	1	13.5	182.4	0	42.5	1	6.25	3.25	3	1.08333	0	1.42
陆和生	1764202	男	69	1	1	13142333138	1.66	69	25.0399	1	1	无	2022-10-01		2023.12.4	14.3	1	24	1	EC+阿替 4个 阿替12个	T4N2bM1b IVA期	IVA期	12.3	10.43	1.63	6.39877	1.87	5.57754	1	1	0.62	0.380368	0	227	139.264	0	9.7	0	2.5	216.1	1	39	0	14.668	11.7344	2.93361	4	0	1.8
蔡铭福	1765817	男	75	1	1	13575069770	1.66	74	26.8544	1	1	无	2022-12-19		2023.4.7	3.6	1	7.3	1	EC+阿替 4个 依托泊苷 0.18g d1-d3+ 卡铂 480mg d1+阿替利 珠单抗 1200mg d1静滴化疗	TxN3M1c IVB期	IVB期	18.27	10.048	1.57	6.4	8.222	1.22209	0	1	0.41	0.261146	0	164	104.459	0	9.7	0	3.5	166.3	0	43.3	0	9.36	8.36	1	8.36	1	1.59
周文松	1625522	男	59	1	1	15116678401	1.6	56	21.875	1	1	无	2022-05-07			7.8	1	11	1	EP+恩沃利单抗	T4N2bM1a IVA期	IVA期	8.96	4.93	1.09	4.52294	4.03	1.22333	0	0	0.56	0.513761	1	175.49	161	0	9.7	1	35	230	0	21.4	2	10.2	6.09	4.11	1.48175	0	1.23
彭千云	1619319	男	49	1	1	15200326137	1.68	68	24.093	1	1	无	2022.4.15		2022.5.19	1.1	1	3.7	1	EP+斯鲁利单抗	cT3N2M1c IV期	IVB期	12.85	10.368	1.62	6.4	2.482	4.17728	2	1	0.54	0.333333	0	280	172.84	1	8.8	0	1.22	352.8	2	43	1	6.75	4.39	2.36	1.86017	1	2.93
汪秋根	1636292	男	65	1	1	13970534780	1.6	60	23.4375	1	1	无	2022.5.20		2022.10.8	4.7	0	13.8	0	EP+斯鲁利	T4N3M1c IVB期	IVB期	5.31	2.92	2.5	1.168	2.39	1.22176	0	0	0.42	0.168	0	198	79.2	0	9.9	0	4.5	214.3	0	41.3	0	4.49	2.92	1.57	1.85987	1	5.14
张冬成	1645896	男	55	1	1	15200597187	1.57	76	30.8329	1	2	无	2022.6.9		2022.11.26	5.7	1.00	6	1	信迪利+白紫+卡铂 5个	cT2bN3M0 IIIB期	IIIB期	6.33	3.48	1.37	2.54015	2.85	1.22105	0	0	0.55	0.40146	1	220.57	161	0	9.1	1	5.5	218.4	0	44.2	0	11.2	7.28	3.92	1.85714	1	1.99
肖炳煌	1643994	男	67	1	0	13762890666	1.66	70	25.4028	1	2	无	2022.6.8		10.6	10.6	1.00	10.1	1	EP+度伐利尤	T4N2M1c？IV期	IVB期	13.5	9.98	1.56	6.39744	3.52	2.83523	0	1	0.6	0.384615	0	235	150.641	0	9.8	1	26.22	163.7	0	38.6	1	12.902	10.3216	2.5804	4	0	1.51
刘平伟	1621350	女	81	2	0	13973835117	1.41	56	28.1676	0	1	无	2022.04.19		10.9	10.9	1	12.9	1	P+信迪利	CT4N3M1c IVB期	IVB期	16.86	9.271	1.27	7.3	7.589	1.22164	0	1	0.19	0.149606	0	249	196.063	1	10.2	1	6.5	204	0	40.7	0	18.28	11.88	6.4	1.85625	1	1.31
唐晓华	1665135	男	55	1	1	18874606072	1.81	76	23.1983	1	1	无	2022.6.24		12.3	12.3	1	12.3	1	EC+度伐 9个	T4N3M0 III期	IIIC期	13.01	7.154	0.98	7.3	5.856	1.22165	0	1	0.61	0.622449	1	171	174.49	1	9	0	7.5	239.8	0	43.9	0	14.37	13.0947	1.27534	10.2676	0	1.52
陈松林	1648582	男	68	1	1	13874288561	1.7	74	25.6055	1	1	无	2022.6.9	0	2023.6.2	11.9	1	15.8	1	EP+斯鲁利6个 斯鲁利3个	cT3N3M1c IVb期	IVB期	8.34	6.789	0.93	7.3	1.551	4.37718	2	1	0.52	0.55914	1	345	370.968	1	8.2	0	24.38	545.5	2	24.2	2	18.38	13.25	5.13	2.58285	0	1.33
陆志刚	1616472	男	75	1	0	18673699232	1.7	68	23.5294	1	1	无	2022.4.1		2022.11.14	7.6	1	13.5	1	EP+度伐利尤 6个	cT3N2M1a IVa期	IVA期	21.24	11.68	1.6	7.3	9.56	1.22176	0	1	0.79	0.49375	1	299	186.875	1	8	0	8.5	127.2	0	46.3	0	14.44	13.1535	1.28647	10.2245	0	1.72
高山	1634714	男	58	1	0	15084775963	1.6	62	24.2188	1	1	无	2022.5.16		2022.10.16	5	1	15.1	1	EC+特瑞普利	cT4N3M1c IVb期	IVB期	8.74	7.008	0.96	7.3	1.732	4.04619	2	1	0.33	0.34375	0	128	133.333	0	8.8	0	9.5	509.3	2	45.3	0	20.08	14.35	5.73	2.50436	0	1.42
雷雪梅	1248548	女	53	2	0	13068828275	1.47	36	16.6597	2	1	无	2020.2.11		2023.2.11	24	0	36.3	0	EC+信迪利 4个	T1cN3M1b IVa期	IVA期	5.41	4.35	1.29	3.37209	1.06	4.10377	2	0	0.52	0.403101	1	154	119.38	0	10.1	0	1.05	343.6	2	41.6	0	9.35	6.08	3.27	1.85933	0	1.58
石玉波	1680757	男	47	1		13212654965	1.68	61	21.6128	1	1	有	2022.7.22		5.7	5.7	1	6	1	EP+斯鲁利 6个	T4N3M1a IVA期	IVA期	10.6	9.42	1.29	7.30233	1.18	7.98305	2	1	1.11	0.860465	1	198	153.488	0	9.6	0	25	246.3	2	23.5	2	6.89	4.48	2.41	1.85892	1	2.23
周炳雄	1364270	男	58	1	1	13874672225	1.65	55	20.202	1	1	无	2020.11.27		5.7	5.7	1	16.5	1	2021.11.24吉西他滨+安罗+阿替7个 2022.2.7 2022.3.1长春瑞滨80mg	T4N3M1c IVB期	IVB期	6.78	5.93	2.01	2.95025	0.85	6.97647	2	0	0.88	0.437811	1	523	260.199	1	9	1	37.51	460.2	2	42.2	1	6.18	4.98	1.2	4.15	2	2.13
卿仕群	1467366	男	55	1		18374683881	1.61	63	24.3046	1	1	无	2021.7.8		23.7	23.7	1	25	1	EP+度伐1500mg 4个周期 度伐37个周期	T4N3M1a IVA期	IVA期	12.3	8.76	1.2	7.3	3.54	2.47458	0	1	0.55	0.458333	0	164	136.667	0	10	0	2.05	167.3	0	40.6	0	8	2.95	5.05	0.584158	0	3.25
刘立平	1468186	男	76	1		15207491257	1.57	55	22.3133	1	1	无	2021.7.8		5.5	5.5	0	12	0	EP+度伐利尤单抗 4个 度伐6个	T4N3M1c IVB期	IVB期	11.59	9.125	1.25	7.3	2.465	3.70183	2	1	0.65	0.52	1	335	268	1	9.3	0	63.01	255.8	2	36	1	6.9	4.85	2.05	2.36585	0	1.78
唐明发	1416392	男	76	1		13517407586	1.68	74	26.2188	1	1	无	2021.4.7		3	3	0	9	0	EP+阿替	cT4N3M1a IVA期	IVA期	13	9.86	1.35	7.3037	3.14	3.14013	2	1	0.61	0.451852	0	209	154.815	0	10	0	27.98	255.3	2	40.2	1	10.12	8.12	2	4.06	2	2.7
黄成凯	1447246	男	62	1	1	13170310386	1.67	57	20.4382	1	1	无	2021.5.31		3.9	3.9	1	18	1	EP+阿替	T4N3M1a IVa期	IVA期	3.43	3.26	1.19	2.7395	0.17	19.1765	2	0	0.4	0.336134	0	190	159.664	0	10	0	14.5	253.8	2	42.5	1	6.51	3.58	2.93	1.22184	0	1.11
丁世晋	1252835	男	85	1		13297417375	1.62	76	28.959	1	1	无	2020.12.8		2021.9.27	9.8	0	16	0	EC+阿替	T4N3M1b IVA期	IVA期	20.44	11.242	1.54	7.3	9.198	1.22222	0	1	0.69	0.448052	1	217	140.909	0	9	0	3.05	219.2	0	34.5	0	7.78	3.76	4.02	0.935323	0	1.54
周文亮	1382598	男	51	1		18273147176	1.65	51	18.7328	1	1	无	2021.1.21		9.4	9.4	0	15.4	0	EP+度伐利尤	cT4N3M0 IIIc期	IIIC期	22.17	12.191	1.67	7.3	9.979	1.22167	0	1	0.4	0.239521	0	163	97.6048	0	8.8	0	4.05	209.2	0	38.3	0	9.33	6.77	2.56	2.64453	0	0.86
谢建富	179620	男	47	1	1	/	1.69	54	18.9069	1	1	无	2020.05.18		37.5667	37.57	0	37.6	0	EP+度伐利尤单抗	T2aN2M1c	IVB期	6.31	3.47	1.39	2.4964	2.84	1.22183	0	0	0.46	0.330935	0	223.79	161	0	10	0	5.05	222.5	0	38.6	0	5.26	2.12	3.14	0.675159	0	2.04
胡小凤	1472851	女	48	2	0	18473915948	1.5	44	19.5556	1	1	无	2021.7.13		8.6	8.6	0	25.3	0	EC+度伐利尤单抗	cT4N3M1b	IVA期	4.21	3.69	1.39	2.65468	0.52	7.09615	2	0	0.55	0.395683	0	223.79	161	0	9.7	1	6.05	318	2	48.5	0	4.09	2	2.09	0.956938	0	0.97
李灿	1504025	女	46	2	0	13397350095	1.63	65	24.4646	0	1	无	2021.9.14		7	7	1	11	1	EC+度伐利尤单抗	cT4N3M1c	IVB期	15.71	8.64	1.35	6.4	7.07	1.22207	0	1	0.39	0.288889	0	203	150.37	0	7.9	0	5.2	199.3	0	45.2	0	6.28	4.08	2.2	1.85455	1	1.56
蒋良春	1413769	男	49	1		13034804162	1.55	43	17.898	1	1	无	2021.03.05		5	5	0	11.7	0	EP+度伐利尤单抗	T4N2M1 IV期	IVA期	8.42	4.63	1.62	2.85802	3.79	1.22164	0	0	0.71	0.438272	1	404	249.383	1	9.4	0	15.5	134.2	0	40.6	1	0.95	0.62	0.33	1.87879	1	0.55
郭佳瑞	1507547	男	66	1		18606555235	1.59	61	24.1288	1	1	无	2021.9.14		3.2	3.2	0	18.5	0	EP+度伐利尤单抗	T4N3M1c IVB期	IVB期	7.69	4.23	2.49	1.6988	3.46	1.22254	0	0	0.77	0.309237	0	267	107.229	0	8.5	0	4.3	223.7	0	38	0	1.02	0.5	0.52	0.961538	0	1.26
谢建军	1456586	男	50	1		13607378151	1.71	92	31.4627	1	1	无	2021.06.10		23.6	23.6	0	23.6	0	EP+度伐利尤单抗	cT4N2M1a IVa期	IVA期	8.42	6.83	2.61	2.61686	1.59	4.2956	2	0	0.96	0.367816	0	277	106.13	0	9.9	0	27.6	404.9	2	43.1	0	6.08	4.08	2	2.04	0	2.62
刘金凡	1430716	男	53	1		13574724178	1.7	62	21.4533	1	1	无	2021.4.15		6	6	1	8	1	EP+度伐利尤单抗	T4N3M1c IVB期	IVB期	11.8	9.41	1.47	6.40136	2.39	3.93724	2	1	0.62	0.421769	0	238	161.905	0	9.4	0	3.87	516.3	2	36.8	0	13.962	11.1696	2.7924	4	0	1.53
王新炜	1276501	男	84	1		13510698979	1.76	91	29.3776	1	1	无	2020.5.14		15.1	15.1	0	15.1	0	EC+阿替利珠单抗	T2bN3M1c IVb期	IVB期	5.66	4.49	1.89	2.37566	1.17	3.83761	2	0	0.58	0.306878	0	157	83.0688	0	9.2	0	2.82	265.9	2	44.6	0	8.1	6.8	1.3	5.23077	1	1.61
曾冬廷	1446963	男	62	1		13973133075	1.71	52	17.7832	1	1	有	2021.5.26		25.1	25.1	1	25.1	1	EP+度伐利尤单抗+放疗	cT4N2M0 IIIB期	IIIB期	13.77	9.088	1.42	6.4	4.682	1.94105	0	1	1.53	1.07746	1	203	142.958	0	9.7	0	5.3	203.2	0	41	0	11	8.45	2.55	3.31373	0	0.74
文笃云	1426698	男	64	1		13107312515	1.7	50	17.301	1	1	无	2021.4.26		6.8	6.8	1	18.8	1	EC+德瓦鲁单抗	cT2N2M1c	IVB期	13.19	8.704	1.36	6.4	4.486	1.94026	0	1	0.57	0.419118	1	183	134.559	0	9.8	1	6.3	174.5	0	35.1	0	15.0985	12.0788	3.0197	4	1	1.46
石功文	1346959	男	54	1		18907309096	1.6	65	25.3906	1	1	无	2020.10.28		9.2	9.2	1	19.8	1	EC+德瓦鲁单抗	T4N3M1a IV期	IVA期	16.31	12.416	1.94	6.4	3.894	3.1885	2	1	1.05	0.541237	1	356	183.505	1	10.7	1	38	249.6	2	42.9	1	15.7979	12.6383	3.15959	4	0	1.56
张后佳	1421517	男	73	1		15873491268	1.66	53	19.2336	1	1	有	2021.3.23		7	7	0	10.8	0	EP/EC+信迪利单抗+放疗	T4N1M0 IIIA期	IIIA期	13.2	12	1.74	6.89655	1.2	10	1	1	1.76	1.01149	1	231	132.759	0	8.4	0	3.9	206.2	1	39.3	0	3.75	2.44	1.31	1.8626	1	1.63
罗银珍	1264107	女	53	2	0	13574512162	1.61	60	23.1473	1	1	无	2020.3.27		5.5	5.5	1	25.5	1	EC+卡瑞利珠单抗	T2bN3M0 IIIB期	IIIB期	15.2	12.672	1.98	6.4	2.528	5.01266	1	1	0.65	0.328283	0	248	125.253	0	10.3	1	4.6	186.3	1	45.6	0	15.71	11.51	4.2	2.74048	0	1.48
邓长贵	1103912	男	85	1	1	13684923308	1.57	58	23.5304	1	1	无	2018.9.30		49	49	1	49	1	EC+Durvalumab	T1cN2aM1b IVA期	IVA期	5.45	3.6	1.6	2.25	1.85	1.94595	0	0	0.53	0.33125	0	164	102.5	0	9.6	0	2.13	214.1	0	38.6	0	6.46	4.2	2.26	1.85841	0	2
官麦轩	1716580	男	79	1	1	15973063869	1.62	52	19.8141	1	1	无	2022-09-15		5+	5	1	6	1	依托泊苷‭ ‬+卡铂+斯鲁利单抗	T4N2M1b IVA期	IVA期	6.67	6.05	0.64	9.45312	0.62	9.75806	2	1	0.07	0.109375	0	103.04	161	0	9.9	0	16.5	320.9	2	41.8	1	14.65	13.3217	1.32826	10.0295	0	1.12
阮庚文	1750095	男	67	1	1	13332591806	1.71	69	23.597	2	1	无	2022-11-18		3	3	1	8.2	1	斯鲁利单抗 +卡铂+依托泊苷	cT4N3M1b,IVB期	IVB期	9.6	8.7	1.36	6.39706	0.9	9.66667	1	1	0.62	0.455882	0	189	138.971	0	9.6	1	8.1	169.2	1	38.3	0	7.22	4.69	2.53	1.85375	0	2.54
李仕义	1755127	男	60	1	1	15873115411	1.59	54	21.3599	0	1	无	2022/11/23		4.4+	4.4	1	4.4	1	依托泊苷+卡铂+度伐利尤单抗	cT4N3M1c IVB期	IVB期	9.89	6.53	1.32	4.94697	3.36	1.94345	1	0	0.66	0.5	1	448	339.394	1	8.7	0	16	258.8	1	28.8	2	5.02	3.26	1.76	1.85227	0	1.74
宁征友	1756061	男	50	1	1	19993737521	1.69	75	26.2596	1	1	无	2022-11-25		4+	4	0	5	0	度伐利尤单抗 +依托泊苷 +顺铂	T2N3M1a IVA期	IVA期	4.05	3.2	2.07	1.54589	0.85	3.76471	2	0	0.61	0.294686	0	255	123.188	0	9.3	0	19	252.1	2	20.8	2	3.35	2.18	1.17	1.86325	0	1.97
陈力	1759514	男	83	1	1	13647481184	1.65	70	25.7117	1	1	无	2022-11-29		5.8+	5.8	1	6	1	度伐利尤单抗‭ ‬+依托泊苷 +卡铂	T4N3M1a IVb期	IVB期	7.17	6.38	0.76	8.39474	0.79	8.07595	2	1	1.18	1.55263	1	391	514.474	1	9.7	0	5	635.3	2	36.3	0	4.8	3.12	1.68	1.85714	0	1.97
伍洪章	1756070	男	48	1	1	15084885527	1.68	70	24.8016	1	1	无	2022-11-28		5.3	5.3	1	5.3	1	度伐利尤单抗 + 依托泊苷 +顺铂	T4N3M0 IIIC期	IIIC期	16	10.56	1.65	6.4	5.44	1.94118	0	1	0.436	0.264242	0	264	160	0	9.4	1	1.31	154.3	0	45.5	0	15.16	12.451	2.70902	4.59611	1	1.42
张少宏	1738749	男	60	1	1	18821962173	1.6	62	24.2188	1	1	无	2022-10-25		2023.10.25	12	1	28	1	依托泊苷+顺铂+阿替丽珠单抗	T4N2M0 IIIB期	IIIB期	10.2	7.55	1.18	6.39831	2.65	2.84906	0	1	0.98	0.830508	1	168	142.373	0	8.9	1	6	226.4	0	1.58	0	4.52	2.94	1.58	1.86076	0	1.25
曾华盛	1738905	男	50	1	1	18883760376	1.65	69	25.3444	1	1	有	2022-10-25		6.6+	6.6	1	8	1	依托泊苷+顺铂+阿替丽珠单抗+放疗	T4N2M1 IVA期	IVA期	13.9	12.3	1.84	6.68478	1.6	7.6875	1	0	1.72	0.934783	1	211	114.674	0	13	1	23.9	296.5	1	40.3	1	14.15	11.32	2.83	4	1	1.69
张铁明	1401789	男	48	1	1	13574865575	1.6	70	27.3438	1	1	无	2022.11.8		5.4+	5.4	1	5.4	1	度伐利尤单抗 +卡铂+依托泊苷	T4N2M1a IVa期	IVA期	13.2	9.34	1.46	6.39726	3.86	2.41969	0	1	0.68	0.465753	0	120	82.1918	0	9.7	0	8	136.8	0	39.1	0	4.52	2.94	1.58	1.86076	0	2.63
彭应辉	1749461	女	65	2	0	13307313088	1.55	45	18.7305	1	1	有	2022-11-05		7+	7	1	13	1	依托泊苷+卡铂+阿替利珠单抗+放疗	T4N0M0 IIa期	IIIA期	6.06	4	1.09	3.66972	2.06	1.94175	0	0	0.78	0.715596	1	175.49	161	0	9.2	0	20	156	0	31.8	2	7.2	4.68	2.52	1.85714	0	0.44
姜新康	1695378	男	65	1	1	18711815957	1.6	67	26.1719	1	1	无	2022-09-28		3.9	3.9	0	8.1	0	阿替利珠单抗+依托泊苷+卡铂	T3N3M0 IVA期	IVA期	17.02	9.36	1.17	8	7.66	1.22193	0	1	0.35	0.299145	0	223	190.598	1	9	0	17.5	214.7	0	39.2	1	7.51	6.83	0.68	10.0441	1	1.38
高斌	1651583	男	53	1	1	18900799748	1.68	80	28.3447	1	1	有	2022-02-12		2023.2.12	12	1	26	1	足叶乙甙+顺铂+度伐利尤单抗	rT3N0M0 IIb期	IIIA期	5.78	3.18	0.55	5.78182	2.6	1.22308	0	0	0.62	1.12727	1	221	401.818	1	9	1	17.9	117	0	42.3	1	5.88	3.82	2.06	1.85437	0	0.72
董尚良	1731075	男	54	1	1	18711066287	1.67	81	29.0437	0	1	无	2022-10-17		7+	7	1	11.5	1	依托泊苷+卡铂+阿替利珠单抗	cT4N1M1 IV期	IVA期	19.47	15.12	1.89	8	4.35	3.47586	2	1	0.58	0.306878	0	266	140.741	0	9.1	0	2	411.6	2	44.7	0	14.4	13.1233	1.2767	10.279	0	1.42
齐绍淼	1728279	男	58	1	1	13974208184	1.68	80	28.3447	0	1	无	2022-10-13		7+	7	1	8	1	阿替利珠单抗+依托泊苷+卡铂	cT4N1M1 IV期	IVA期	22.4	12.32	1.54	8	10.08	1.22222	0	1	0.62	0.402597	1	265	172.078	1	10.8	1	21	190.1	0	30.5	2	14.17	9.21	4.96	1.85685	0	0.86
李京良	1736996	男	82	1	1	18665175765	1.6	52	20.3125	1	1	有	2022-10-11		2023.3.11	5	1	18.3	1	依托泊苷+卡铂+阿替利珠单抗	cT3N3M1 IVb期	IVB期	15.84	12.56	1.57	8	3.28	3.82927	2	1	0.62	0.394904	0	312	198.726	1	8.1	1	54.75	515.6	2	41.1	1	22.34	14.52	7.82	1.85678	0	1.37
颜克福	1737936	男	55	1	1	18684799435	1.67	71	25.4581	0	1	无	2022-10-18		暂无	23	1	23	1	依托泊苷+卡铂+阿替利珠单抗	cT4N2M1 IVb期	IVB期	13.1	11.9	1.87	6.36364	1.2	9.91667	1	1	0.88	0.470588	0	249	133.155	0	8.8	1	6.9	317.6	1	46.7	0	3.26	2.12	1.14	1.85965	0	2.36
罗菊梅	1740419	女	59	2	0	15889603642	1.54	55	23.1911	1	1	无	2022-10-31		2023.8.31	10	1	17	1	阿替利珠单抗+依托泊苷+卡铂	T4N3M1c IVB期	IVB期	28.65	15.76	1.97	8	12.89	1.22265	0	1	0.33	0.167513	0	368	186.802	1	8	0	6.5	198.3	0	41.2	0	18.38	11.95	6.43	1.85848	0	1.11
李明	1741507	男	53	1	1	13975906293	1.63	57	21.4536	1	1	有	2022/10//		2023.2	4	1	20	1	依托泊苷+卡铂+阿替利珠单抗	T1cN2bM0 IIIA期	IIIA期	5.76	3.17	1.09	2.90826	2.59	1.22394	0	0	0.39	0.357798	0	121	111.009	0	11.4	1	18.5	159.6	0	42.9	1	4.38	2.85	1.53	1.86275	0	0.4
周宏中	1742530	男	65	1	1	17329258989	1.68	64	22.6757	1	1	无	2022-10-31		4.6	4.6	1	4.8	1	阿替利珠单抗+卡铂+依托泊苷	T2aN2aM1b IVA期	IVA期	8.16	6.69	2.35	2.84681	1.47	4.55102	2	0	0.69	0.293617	0	337	143.404	0	10.3	1	8.6	658	2	31.9	0	4.34	2.82	1.52	1.85526	1	1.18
李保民	1286461	男	53	1	1	13332590436	1.73	73	24.3911	1	1	无	2020/5/14		27.0	27	1	37	1	EP+A阿替ezolizumab	T2aN2bM1c1 IVB期	IVB期	9.76	5.37	1.73	3.10405	4.39	1.22323	0	0	0.53	0.306358	0	244	141.04	0	11.5	1	2.94	170.9	0	48.2	0	3.42	2.22	1.2	1.85	0	1.42
宋建军	1275770	男	76	1	1	13681211263	1.72	57	19.2672	1	1	无	2020-05-15		3.5+	3.5	1	4	1	EC+a阿替ezolizumab	T2aN2bM1c1 IVB期	IVB期	17.75	9.76	1.22	8	7.99	1.22153	0	1	0.43	0.352459	0	220.82	181	1	8	0	11.96	180	0	41.8	1	13.8003	11.0403	2.76007	4	0	1.21
黎华英	1459023	女	49	2	0	15873000932	1.68	60	21.2585	0	1	无	2021.6.7		10.7+	10.7	1	9.7	1	EP+阿替丽珠单抗	T2N2M1 IV期	IVB期	22.55	12.4	1.55	8	10.15	1.22167	0	1	0.26	0.167742	0	217	140	0	7.6	0	6.9	224.6	0	40.7	0	17.85	11.6	6.25	1.856	0	1.07
张国庭	1188258	男	68	1	1	13975825363	1.6	56	21.875	1	1	无	2019-07-15		3.2+	3.2	1	4.2	1	EP/ EP+阿特丽珠单抗	T2N2M1c IVB期	IVB期	11.05	6.08	0.76	8	4.97	1.22334	0	1	0.41	0.539474	1	136	178.947	1	7.2	0	13.41	237.2	0	38.6	1	15.23	12.9855	2.24446	5.7856	2	1.36
周国良	1177850	男	64	1	1	15973154707	1.58	68	27.2392	1	1	无	2020/9/21		4.9	4.9	1	13.5	1	EC /EC+信迪利单抗	T4N2M1c IVb期	IVB期	15.16	12.736	1.99	6.4	2.424	5.25413	2	1	0.65	0.326633	0	255	128.141	0	6.7	0	2.26	536.5	2	45	0	15.009	12.0072	3.0018	4	1	1.61
曾建安	1365208	男	53	1	1	18665036789	1.59	65	25.711	1	1	无	2020-12-07		5.5	5.5	1	14.9	1	EP+信迪利单抗	cT4N3M0 IIIc期	IIIC期	10.91	6	0.95	6.31579	4.91	1.222	0	1	0.53	0.557895	1	187	196.842	1	8	0	6.53	226.6	0	45.1	0	8.49	6.82	1.67	4.08383	1	0.82
张群如	1696165	女	48	2	0	18397470705	1.5	47	20.8889	1	1	无	2022.8.16		9.5+	9.5	0	13.5	0	依托泊苷 顺铂 斯鲁利单抗300mg	T4N1M1a IVb期	IVB期	8.36	6.8	1.71	3.97661	1.56	4.35897	2	0	0.5	0.292398	0	447	261.404	1	9.1	0	20	279	2	40.3	1	7.42	6.42	1	6.42	1	2.16
冯三元	1695925	女	79	2	0	13367400331	1.54	61	25.721	1	1	无	2022.8.15		6.5+	6.5	1	14.1	1	依托泊苷，卡铂，度伐利尤单抗	cT4N3M0 IIIC期	IIIC期	8.04	7.04	1.1	6.4	1	7.04	0	1	0.44	0.4	0	176	160	0	13	1	1.91	177.7	0	42.7	0	9.05	7.75	1.3	5.96154	1	2.03
罗建新	1644071	男	62	1	1	18617087031	1.7	70	24.2215	2	1	无	2022-06-02		11.9	11.9	1	24	1	培美曲塞+卡铂+斯鲁丽单抗	cT1N2M1c IVb期	IVB期	7.15	5.696	0.89	6.4	1.454	3.91747	2	1	0.82	0.921348	1	119	133.708	0	11.4	1	5	429	2	44.2	0	5.62	4.95	0.67	7.38806	2	0.91
吴俊贵	1719783	男	82	1	1	18374874344	1.69	73	25.5593	1	1	有	2022-09-08		2023.9.14	11.5	1	24	1	依托泊依托泊苷+卡铂+阿替利珠单抗+放疗	cT4N2M1c IVb期	IVB期	13.45	7.936	1.24	6.4	5.514	1.43925	0	1	0.46	0.370968	0	201	162.097	0	7.6	0	5	202	0	41.9	0	13.49	8.77	4.72	1.85805	0	1.33
刘伍伍	1719903	男	67	1	1	13875783508	1.63	73	27.4756	1	1	无	2022-09-23		8.3+	8.3	0	25	0	依托泊苷+卡铂+阿替利珠单抗	cT4N2M0 IIIB期	IIIB期	11.86	7	2.64	2.65152	4.86	1.44033	1	0	0.7	0.265152	0	439	166.288	0	9.3	0	5	295.6	1	41.7	0	11.71	7.61	4.1	1.8561	0	1.79
王再强	1716045	男	52	1	1	15526480478	1.73	77	25.7276	0	1	无	2022-09-14		8.4+	8.4	1	20	1	依托泊苷+卡铂阿替利珠单抗+贝伐珠单抗	cT4N1M1 IV期	IVA期	17.72	10.4538	1.33	7.86	7.2662	1.43869	1	1	0.19	0.142857	0	433	325.564	1	9.4	0	25	288	1	37.7	1	10.4	8.44	1.96	4.30612	1	2.51
莫宝连	1711891	男	56	2	0	15574560158	1.85	105	30.6793	1	1	无	2022.9.7		2.8	2.8	0	6.9	0	依托泊苷+卡铂+度伐利尤单抗	T4N3M1a IVa期	IVA期	12.17	8.17	1.04	7.85577	4	2.0425	0	1	0.52	0.5	0	168	161.538	0	6.4	0	1.08	200	0	45.9	1	14.58	11.38	3.2	3.55625	2	1.05
安良文	1524338	男	71	1	1	15273833558	1.66	88	31.935	1	1	无	2022.10.21		10.9	10.9	1	13.7	1	信迪利单抗+依托泊苷+卡铂	T4N2M1a IVa期	IVA期	4.32	2.55	2.08	1.22596	1.77	1.44068	0	0	0.6	0.288462	0	204	98.0769	0	11	1	2.12	179	0	47.2	0	3.83	2.49	1.34	1.85821	0	1.96
周和平	1636137	男	60	1	1	18929366090	1.63	67	25.2174	1	1	无	1905-07-14 12:00:00		6.1	6.1	1	12.6	1	依托泊苷+卡铂+斯鲁利单抗	T4N2M1a IVa期	IVA期	10.31	8.44	1.31	6.44275	1.87	4.51337	2	1	0.76	0.580153	1	303	231.298	1	8.7	0	5	486	2	36	0	13.2858	10.6286	2.65716	4	0	1.59
王美英	1692840	女	62	2	0	13548555966	1.49	51	22.9719	1	1	无	2022.8.17		2022.12.17	4	1	7	1	斯鲁利单抗+依托泊苷+顺铂	cT4N3M0 ⅢC期	IIIC期	10.1	8.17	1.04	7.85577	1.93	4.23316	2	1	0.93	0.894231	1	329	316.346	1	9.2	0	17.9	288.4	2	38	1	13.6518	10.9215	2.73037	4	2	1.36
朱胜强	1289282	男	46	1	1	13807326328	1.7	72	24.9135	1	1	无	2022.6.17		14.6	14.6	1	36.1	1	阿特珠单抗+依托泊苷+顺铂	T4N1M1c IVB期	IVB期	10.3	8.9	1.09	8.16514	1.4	6.35714	2	1	0.77	0.706422	0	169	155.046	0	9	0	4.41	251	2	51.3	0	14.9754	11.9803	2.99509	4	0	1.48
金日于	1470244	男	69	1	1	15116161882	1.66	62	22.4996	1	1	无	2021.7.1		22.7+	22.7	0	22.7	0	度伐利尤单抗+卡铂+依托泊苷	T3N1M0 IIIa期	IIIA期	4.25	2.51	0.54	4.64815	1.74	1.44253	0	0	0.99	1.83333	1	309	572.222	1	9.6	0	23	175	0	40.3	1	5.37	4.79	0.58	8.25862	1	1.16
林海青	1629519	男	50	2	0	13786944965	1.62	61	23.2434	1	1	无	2022.5.14		2022.9.14	4	1	12	1	特瑞普利单抗+依托泊苷+卡铂	cT3N3M1c IVb期	IVB期	14.79	8.7246	1.11	7.86	6.0654	1.43842	0	1	0.63	0.567568	1	329	296.396	1	8.6	1	3.01	232	0	45	0	15.09	12.7101	2.37988	5.34064	0	1.37
罗共和	1667426	男	83	1	1	13874834902	1.62	63	24.0055	1	1	无	2022.7.8		2.5+	2.5	1	12.5	1	斯鲁利单抗+依托泊苷+卡铂	T3N3M1 IVa期	IVA期	14.25	10.7682	1.37	7.86	3.4818	3.09271	2	1	1.29	0.941606	1	388	283.212	1	9.6	0	24.5	298	2	39.4	1	15.0571	12.0457	3.01143	4	0	1.24
舒发兵	1670233	男	54	1	1	15074587314	1.6	53	20.7031	1	1	无	1905-07-14 14:24:00		12.9+	12.9	1	12.9	1	斯鲁利单抗+依托泊苷+卡铂	T4N3M1c IVb期	IVB期	14.45	12.6546	1.61	7.86	1.7954	7.04835	2	1	0.42	0.26087	0	174	108.075	0	8.9	0	9.41	380	2	44.7	0	15.01	12.25	2.76	4.43841	1	1.4
易自红	1401358	男	48	1	1	13647499480	1.5	62	27.5556	1	1	有	2021-02-25		18.7	18.7	1	27.5	1	依托泊苷+卡铂+阿替利珠单抗+放疗	T4N2M0 IIIb期	IIIB期	8.76	5.17	1.27	4.07087	3.59	1.44011	0	0	0.9	0.708661	1	204.47	161	0	8.5	0	1.67	158	0	45.8	0	10.72	6.97	3.75	1.85867	0	1.07
沈铁祥	1651208	男	51	1	1	15111058112	1.65	60	22.0386	1	1	无	2022.6.14		2023.6.8	11.9	1	15	1	斯鲁利单抗+依托泊苷+顺铂	cT4N3M1c IVB期	IVB期	6.91	5.55	2.08	2.66827	1.36	4.08088	2	0	0.94	0.451923	1	316.16	152	0	8.7	1	5	426	2	40.3	0	6.15	4	2.15	1.86047	0	2.01
李有才	1609721	男	68	1	1	18073913987	1.69	45	15.7558	1	1	有	2022.3.24		14+	14	1	14	1	度伐利尤单抗+依托泊苷+卡铂	cT4N2M1a期;	IVA期	4.68	2.76	1.85	1.49189	1.92	1.4375	0	0	0.35	0.189189	0	203	109.73	0	10.2	1	7.88	147.5	0	41.7	0	3.14	2.04	1.1	1.85455	0	1.38
肖利平	1591713	女	59	2	0	18711966812	1.57	63	25.5588	0	1	无	2022.2.25		6.7	6.7	1	7.6	1	阿替利珠单抗+依托泊苷+卡铂	cT1N2M1c IV期	IVB期	13.2	9.75	1.24	7.8629	3.45	2.82609	0	1	0.5	0.403226	0	191	154.032	0	9	0	2.17	154	0	42.4	0	6.37	4.14	2.23	1.8565	0	1.74
何文	1638257	男		1	1	13786593559	1.58	55	22.0317	1	1	无	2022.5.17		2022.11.17	4.1	1	12	1	斯鲁利单抗+依托泊苷+卡铂	T4N3M1a IVa期	IVA期	9.78	5.77	1.61	3.58385	4.01	1.4389	0	0	0.76	0.47205	1	311	193.168	1	10.1	0	4.97	201	0	43.9	0	7.92	5.15	2.77	1.85921	0	1.8
陈梅英	1652937	女	65	2	0	13147067659	1.46	40	18.7652	0	1	无	2022-06-17		2.3	2.3	1	5	1	斯鲁利单抗+依托泊苷+顺铂	T3N2M0 IIIb期	IIIB期	3.02	2.32	0.9	2.57778	0.7	3.31429	2	0	0.3	0.333333	0	168	186.667	1	9.9	1	22	253	2	28.2	2	1.57	1.02	0.55	1.85455	1	0.45
曾竹桂	1706947	男	46	1	1	18075116385	1.55	41	17.0656	0	1	无	2022-09-06		2.2+	2.2	1	5.2	1	斯鲁利单抗+依托泊苷+顺铂	cT4N2M1a ⅣA期	IVA期	11.02	6.06	1.68	3.60714	4.96	1.22177	0	0	0.61	0.363095	0	337	200.595	1	8.8	0	23	187	0	26.2	2	11.85	9	2.85	3.15789	1	2
杨昆	1719785	男	55	1	1	15608414770	1.75	90	29.3878	0	1	无	2022-09-27		2.7	2.7	1	8.5	1	依托泊苷+卡铂+度伐利尤单抗	T4N3M1c IVb期	IVB期	16	11.6	1.8	6.44444	4.4	2.63636	0	1	0.73	0.405556	0	273	151.667	0	9.5	1	13	218	0	34.6	2	15.06	12.691	2.36899	5.35714	2	2
黎金华	1665582	1	55	1	1	13787993527	1.63	52	19.5717	1	1	无	2022-06-13		9.1	9.1	1	16	1	度伐利尤单抗+依托泊苷+卡铂	T4N2M0 IIIB期	IIIB期	4.01	3.04	1.62	1.87654	0.97	3.13402	2	0	0.32	0.197531	0	135	83.3333	0	8.6	0	15	472	2	42.9	1	9.23	6	3.23	1.85759	0	2.19
刘茂全	1407446	男	53	1	1	13298603189	1.67	49	17.5697	1	1	有	2021.3.15		7.3	7.3	1	14.9	1	EP+a阿替ezolizumab=	T3N2M1a IVa期	IVA期	12.73	7	1.65	4.24242	5.73	1.22164	1	0	1.17	0.709091	1	300	181.818	1	9.1	0	12	279	1	38.1	1	4.62	3	1.62	1.85185	0	0.9
袁怀志	1540079	男	46	1	1	15575111110	1.65	82	30.1194	1	1	有	2021-11-10		11.7333	11.7	1	14.7	1	EC+a阿替ezolizumab=	cT3N3M0 IIIC期	IIIC期	10.51	5.78	2.48	2.33065	4.73	1.22199	0	0	0.61	0.245968	0	256	103.226	0	10.1	0	5	242	0	48.7	0	9.29	6.04	3.25	1.85846	0	1.9
简德凡	1368797	男	77	1	1	13928292528	1.69	68	23.8087	1	1	无	2020-11-27		9.5	9.5	1	9.1	1	EC+a阿替ezolizumab	T3N2M0 IIIb期	IIIB期	6.62	5.84	1.17	4.99145	0.78	7.48718	2	0	0.48	0.410256	1	256	218.803	1	9.6	1	6.97	528	2	43.8	0	7.69	6.81	0.88	7.73864	1	0.84
陈亚雄	00800778	男	56	40年 20支/日	1	18670000034	1.68	58	20.5499	1	2	有	2020.03.30	2020.04.22	2021.03.30	12	1	39.2	1	特瑞普利240mg+ 依托泊苷注射液 150mg 顺铂40mg 4次后放疗 信迪利单抗 200mg 依托泊苷注射液 100mg 注射用洛铂 45mg	T2bN3M1C	IVB期	8.96	4.93	0.85	5.8	4.03	1.22333	1	0	0.71	0.835294	1	129.2	152	0	8.6	1	40.1	325.17	1	30.7	0	12.18	7.92	4.26	1.85915	0	1.25
肖秋云	00862851	男	83	40年 20支/日	1	15211825810	1.76	73	23.5666	1	1	无	2021.04.03	2021.04.28	2022.4.3	12	1	30	1	依托泊苷注射液110mg(d1-d3)+ 顺铂100mg（d1）化疗、 度伐利尤单抗1000mg 4次化+免，后度单免10次	cT3N2M1c IVB期	IVB期	3.01	2.51	1.18	2.12712	0.5	5.02	2	0	0.67	0.567797	1	176	149.153	0	8.9	0	5.22	546.3	2	37.3	0	3.54	2.3	1.24	1.85484	1	1.37
何星福	00847797	男	63	50年 20支/日	1	18973129885	1.6	50	19.5312	2	1	无	2020.11.30	2021.03.25	2021.07.07	11.4	1	16	1	度伐利尤单抗（英非凡） 1000mg免疫治疗 +依托泊苷150mg+ 卡铂注射液450mg化疗	T4N2M1c IVB期	IVB期	10.78	8.128	1.27	6.4	2.652	3.06486	2	1	0.68	0.535433	1	380	299.213	1	9.7	1	37.2	431	2	21.6	2	6.72	4.37	2.35	1.85957	0	1.54
佘太平	00894235	男	83	30年 40支/日	1	15285729290	1.57	55	22.3133	1	1	无	2021.8.24	2021.8.27		6	1	15	1	度伐利尤单抗1000mg 依托泊苷150mg	cT4N3M0 IIIC	IIIC期	11.2	9.472	1.48	6.4	1.728	5.48148	2	1	0.77	0.52027	1	301	203.378	1	11	1	11.1	276.5	2	37.7	1	7.6	4.94	2.66	1.85714	0	0.77
陈立国	00904730	男	60	20年 15支/天	1	18707325634	1.73	74	24.7252	0	2	有	2021.10.27	2022.01.21	2023.06.20 2021.11.05放疗 2021.11.08化疗	14.5	1	41	1	依托泊苷140mg d1-3 顺铂55mg d1-2 度伐利尤单抗 1000mg	T4N3M1C IVB 期	IVB期	4.91	2.7	0.34	7.94118	2.21	1.22172	0	1	0.28	0.823529	1	257	755.882	1	9.1	0	5	174	0	49.38	0	7.2	4.68	2.52	1.85714	0	0.3
黄秀贞	00924506	女	67	无，二手烟	0	13707481407	1.49	44.2	19.909	0	2	有	2022.02.08	2022.11.01	2022.10.29	8.8	1	24	1		T3N2M0 ⅢB 期	IIIB期	8.8	4.84	0.68	7.11765	3.96	1.22222	0	1	0.28	0.411765	1	167	245.588	1	8.4	0	26.9	180.1	0	55	2	9.92	6.45	3.47	1.85879	0	0.55
李梅秀	00930421	女	51	无，二手烟	0	15211590360	1.69	76	26.6097	1	1	无	2022.03.12	2022.3.21	2022.11.7	8	1	24.1	1	依托泊苷（d1-d3）185mg+ 卡铂（d1）580mg+阿替利珠单抗200mg	cT4N2M0 ⅢB期	IIIB期	14.55	8	1.25	6.4	6.55	1.22137	0	1	0.37	0.296	0	301	240.8	1	11.1	1	6.04	233.8	0	43.2	0	4.08	2.65	1.43	1.85315	0	0.98
郝熙皇	00934853	男	49	吸烟30年， 平均40支／日	1	15116377287	1.71	78	26.6749	1	1	有	2022.4.28	2022-05-10	2022.11.19	6.8	1	9.6	1	依托泊苷138mmg（d1-d3） 卡铂480mmg（d1）化疗， 度伐利尤单抗1000mg	右肺小细胞肺癌 cT2N3M1b IVA期	IVA期	19.78	10.88	1.7	6.4	8.9	1.22247	0	1	0.73	0.429412	1	335	197.059	1	9.8	1	3.34	214.6	0	40.25	0	4.72	3.07	1.65	1.86061	0	1.05
李忠	00965504	男	50	吸烟二十余年 1-2包/天	1	13637451749	1.7	59	20.4152	1	1	有	2022.10.8	2022.10.9		6.9	1	22.2	1	度伐利尤单抗 1000mg 静滴 d0 依托泊苷160mg 静滴 d1-3 顺铂40mg 静滴 d1-3	右侧胸腔积液 头部多发转移 T1cN2M1b IVA期	IVA期	13.6	11.328	1.77	6.4	2.272	4.98592	1	1	0.67	0.378531	0	240	135.593	0	9.2	1	10.05	220.2	1	39.34	1	13.77	8.95	4.82	1.85685	0	0.99
周尚辉	00659996	男	57	烟30余年，平均2包／日	1	18008485348	1.72	60	20.2812	1	2	有	2019.04.09		2019.12.09	8	1	11	1	帕博利珠单抗 200mg 帕博利珠单抗 200mg	右上肺 （cT4N2M0 IIIB期）	IIIB期	6.19	4.78	0.34	14.0588	1.41	3.39007	2	1	0.07	0.205882	0	60	176.471	1	8.7	0	10	276.9	2	34.7	0	7.72	5.02	2.7	1.85926	1	0.39
唐友时	00796732	男	75	无	0	15874803986	1.7	75	25.9516	0	2	有	2020.2.20		2020.10.28	8	1	31	1	信迪利单抗 200mg 静滴 d1 紫杉醇脂质体 240mg 静滴 d1	cT2aN2bM1c IVB期	IVB期	9.22	7.27	1.53	4.75163	1.95	3.72821	1	0	0.19	0.124183	0	264	172.549	1	8	1	无	173.2	1	41.5	1	13.6	8.84	4.76	1.85714	0	1.04
彭培弟	00869350	男	61	吸烟50年，平均10支／日	1	18975103738	1.78	80	25.2493	2	2	无	2021.4.16		2021.8.17	4.1	1	6.6	1	信迪利单抗200mg 静滴 Qd 依托泊苷180mg 静滴 d1-3 Qd 卡铂650mg 静滴 d1 Qd	cT4N2bM1c2 IVB期	IVB期	8.4	6.82	0.62	11	1.58	4.31646	2	1	0.1	0.16129	0	295	475.806	1	7.9	1	11.05	449	2	27.15	1	9.52	8.14	1.38	5.89855	2	0.45
徐长龙	00894633	男	85	无	0	13469079697	1.6	56	21.875	1	1	无	2021.9.16			10	0	28	0	信迪利单抗200mg 培美曲塞二钠750mg 卡铂460mg	左上肺 cT4N0M1 IV期 肾上腺转移	IVA期	11.9	8.26	1.29	6.4031	3.64	2.26923	0	1	0.69	0.534884	0	187	144.961	0	8.8	0	40.2	210.1	0	23.02	2	6.45	4.19	2.26	1.85398	0	2.28
罗喜德	00795834	男	52	20年，3-4包/天	1	18974008278	1.68	92	32.5964	1	2	有	2020.3.11		2020.11.11	8	0	15	0	信迪利单抗200mg 静滴 d0 qd； 盐酸伊立替康190mg 静滴 d1， 160mg 静滴 d8	CT1N2M1a IV期	IVA期	5.6	3.08	1.16	2.65517	2.52	1.22222	0	0	0.34	0.293103	0	129	111.207	0	8.2	0	18.4	187.06	0	35.71	1	3.83	2.49	1.34	1.85821	0	1.13
陈爱香	00780054	女	51	无	0	13243660433	1.58	48	19.2277	1	2	无	2019.11.7			3	1	19	1	度伐利尤单抗740mg 静滴 d0 qd 盐酸伊立替康100mg 静滴 d1 qd 洛铂40mg 静滴 d1 qd	cT3N1M1 IVA期 脑转移癌	IVA期	6.22	3.42	0.59	5.79661	2.8	1.22143	0	0	0.41	0.694915	1	89.68	152	0	8.2	0	41.2	207.35	0	26.9	2	13.02	8.46	4.56	1.85526	0	1.15
黄云波	00667314	男	46	30年，40支每天	1	18570358910	1.67	56	20.0796	0	2	有	2018.1.19			3.5	0	18	0	特瑞普利单抗240mg	T3N2M0-IIIb期	IIIB期	4.6	2.67	0.46	5.80435	1.93	1.38342	0	0	0.42	0.913043	1	69.92	152	0	8.9	0	12.05	179.34	0	37	1	4.4	3.51	0.89	3.94382	2	0.62
黎胜泉	00909409	男	52	无	0	13077115706	1.72	58	19.6052	1	1	无	2021.11.12	2021.11.25	2022.11.01	11.2	1	18	1	阿替利珠单抗 1200mg 静滴 d1 依托泊苷 171mg 静滴 d1-d3 顺铂 120mg 静滴 d1	左肺上叶小细胞肺癌广泛期 cT2N1M1c IV期 （左肺门淋巴结转移 左侧胸膜转移 右腋窝淋巴结及多发骨转移） 免疫联合化疗后进展再次免疫联合化疗后	IVB期	13.87	10.944	1.71	6.4	2.926	3.74026	1	1	0.48	0.280702	0	236	138.012	0	8.5	0	<3.14	234.5	1	35.43	0	13.1842	10.5473	2.63684	4	1	1.48
李维	00052954	男	85	吸烟40余年， 平均30支/日	1	13907314575	1.71	81	27.7008	2	1	有	2023.10.1		2024.8.7	10.4	1	14	1	奈达铂10mg+依托泊 苷100mg+斯鲁利单抗	右肺 T3N3M 0 IIIC期 肝右叶多发、双肾上 腺、左侧膈肌、心包、右肺动静 脉受累	IIIC期	14.68	8.512	1.33	6.4	6.168	1.38003	0	1	0.54	0.406015	1	206	154.887	0	8.6	0	5	166.6	0	38.88	0	10.15	6.6	3.55	1.85915	0	0.96
左华生	00088469	男	75	无	0	13487315687	1.58	65	26.0375	2	1	无	2023.4.21			5	1	10	1	依托泊苷 150,d1-d3, q21d+顺铂 100mg,d1, q21d）+斯鲁利单抗300mg,	左肺下叶 T3 N2M1b IVA期	IVA期	7.14	4.14	0.91	4.54945	3	1.38	0	0	0.43	0.472527	1	226	248.352	1	10.7	1	42.2	232	0	31.78	2	4.69	3.05	1.64	1.85976	1	0.64
廖林均	00103201	男	68	无	0	15308407478	1.68	75	26.5731	1	2	无	2021.8.17			12	1	40	1	D1-3依托泊苷185mg +顺铂130mg+ 替雷利珠单抗200mg	右下肺T3 N0M1b IVA期	IVA期	12.3	9	1.27	7.08661	3.3	2.72727	0	1	0.5	0.393701	0	184	144.882	0	9.2	0	20	188	0	43.36	0	19.54	12.7	6.84	1.85673	0	1.3
谭慧琼	00718480	女	53	无	0	13469067626	1.56	60	24.6548	0	1	有	2023.4.10		2023.11.10	7	0	24	0	斯鲁利单抗300mg 依托泊苷150mg+卡铂550mg治疗	右上肺 T2bN3M1c IVB期 （左侧额叶、枕叶多发脑转移 右颈部淋巴结转移）	IVB期	19.53	11.328	1.18	9.6	8.202	1.38113	0	1	0.28	0.237288	0	279	236.441	1	10	0	0.4	179.3	0	40.88	0	3.34	2.17	1.17	1.8547	0	0.89
万兰球	00980058	男	60	有吸烟史30+年 每日1包 已戒烟2年	1	13017303777	1.75	75	24.4898	0	2	有	2023.1.4	2023.8.30	2023.9.30	1	1	6	1	度伐利尤单抗 1000mg 续滴 注射用顺铂 60mg 静滴 d1,8 盐酸伊立替康 130mg 续滴 d1,8	左下肺小细胞肺癌 (cT2N3M1 IVB期)放化疗后	IVB期	3.9	3.71	0.83	4.46988	0.19	19.5263	2	0	0.08	0.0963855	0	287	345.783	1	10.1	1	43.2	282.3	2	26.18	2	5.11	3.32	1.79	1.85475	0	0.31
向长军	00990653	男	52	吸烟30余年， 平均40支／日，已戒烟10天	1	15115158417	1.68	80	28.3447	0	1	无	2023.3.23	2023.8.23		5	1	26	1	斯鲁利单抗300mg 卡铂700mg d1 依托泊苷160mg	右下肺小细胞肺癌 cT4bN0M0	IIIA期	7.02	4.07	1.6	2.54375	2.95	1.37966	0	0	0.5	0.3125	0	256	160	0	9.5	0	9.85	186.4	0	43.49	1	12.48	8.11	4.37	1.85584	0	1.77
潘正根	00991601	男	63		1	13873136559	1.69	66	23.1084	0	2	无	2023.03.23	2023.07.31	2023.12.31	5	1	26	1	阿得贝利单抗 1200mg 续滴 d0 伊立替康 116mg 静滴 d1 奈铂达 120mg 静滴 d1	1左肺小细胞肺癌cT3NxM0 免疫 化疗后进展 免疫靶向治疗后	IIIB期	18.04	10.464	1.09	9.6	7.576	1.3812	0	1	0.6	0.550459	1	85	77.9817	0	9.8	0	13.05	173	0	39..97	1	15.18	12.9401	2.23994	5.77697	0	1.17
张天保	01053161	男	52	20年 20支/日	1	19973724936	1.72	56	18.9292	0	1	无	2023.06.07	2023.06.13		10	1	24	1	斯鲁利单抗（260mg d0） 依托泊苷 100mg/m2 d1、d2、d3 顺铂75mg/m2 d1）	右肺小细胞肺Ca （T2N3M1c Ⅳ期）	IVB期	13.9	8.064	0.84	9.6	5.836	1.38177	0	1	0.76	0.904762	1	379	451.19	1	8.7	0	11.16	214	0	40.39	1	12	7.8	4.2	1.85714	0	0.75
吴增生	00993962	男	78	无	0	15273993531	1.58	48	19.2277	0	2	有	2023.03.25	2023-09-27	2023.08.08	4.5	1	17.5	1	阿得贝利单抗 1200mg 静滴 d0 伊立替康100mg 静滴 90分钟 d1	右肺小细胞肺癌（cT4N2M0 II IB期 局限期） 放化疗后进展化 疗后	IIIA期	8.12	6.45	0.84	7.67857	1.67	3.86228	1	1	0.47	0.559524	1	176	209.524	1	9.4	0	14.05	166.9	1	30.95	1	14.18	9.22	4.96	1.85887	1	0.68
王介文	02007518	男	80	40年 10支/日	1	18674816916	1.67	55	19.721	2	1	无	2023.05.30	2023.06.13	2023.09.24	3.4	1	7.6	1	斯鲁利单抗300mg 卡铂 250mg d1 依托泊苷 100mg d1-3	右肺小细胞癌 T4N3M1a IVA期 （纵隔、右肺门、 右锁骨下淋巴结转移）	IVA期	12.88	9.792	1.02	9.6	3.088	3.17098	2	1	0.6	0.588235	1	155.04	152	0	10	1	68.49	280.7	2	19.47	2	22	14.3	7.7	1.85714	0	1.29
宋业军	02014648	男	51	20年 40支/日	1	15973186387	1.68	74	26.2188	0	1	无	2023.07.10	2023.07.19	2023.12.22	5.5	0	6.4	0	斯鲁利单抗（300mg） 依托泊苷+卡铂	左肺上叶小细胞肺癌 cT4N3M1c IV期 (肝脏多发转移)	IVB期	4.16	3.19	0.77	4.14286	0.97	3.28866	2	0	0.24	0.311688	0	178	231.169	1	9.9	0	<3.19	319.8	2	36.58	1	1.62	1.05	0.57	1.84211	1	0.42
梁慧然	02019406	男	51	无	0	18874449356	1.67	75	26.8923	1	2	无	2023.07.31	2023.12.15	2023.11.31	4	0	6.5	0	替雷利珠单抗200mg 依托泊苷180mgD1-D3 卡铂250mgD1-D2	右肺小细胞癌 cT2bN3M1a-IVA 期（胸膜转移）	IVA期	20.52	11.904	1.24	9.6	8.616	1.38162	0	1	0.37	0.298387	0	214	172.581	1	9.5	0	23	143.1	0	30.67	2	5.15	3.35	1.8	1.86111	0	1.3
童振宇	02024824	男	51	30年，20支每天	1	13687378698	1.78	69	21.7776	0	1	无	2023.09.04	2023.09.12		12	1	19.8	1	依托泊苷150mg D1-D3 卡铂700mg D1 联合度伐利尤单 1000mg D1	左肺小细胞肺癌 cT4N2M1a（胸膜转移）	IVA期	9.04	7.17	0.9	7.96667	1.87	3.83422	2	1	0.43	0.477778	1	324	360	1	9.2	0	11.3	459.6	2	39.74	1	14.5636	11.6509	2.91271	4	0	1.39
[truncated: 17 more columns]
